# Supplementary material for: Assessment of patient-reported outcomes after polytrauma: protocol for a systematic review
Source: PubMed Central journal article supplement — BMJ Open. 2018 Mar 16;8(3):e017571. doi: 10.1136/bmjopen-2017-017571 (PMC5857702; doi:10.1136/bmjopen-2017-017571), 2018-03-16
Supplement: bmjopen-2017-017571.draft_revisions.pdf [file bmjopen-2017-017571.draft_revisions.pdf]

# BMJ Open

BMJ Open is committed to open peer review. As part of this commitment we make the peer review history of every article we publish publicly available.

When an article is published we post the peer reviewers' comments and the authors' responses online. We also post the versions of the paper that were used during peer review. These are the versions that the peer review comments apply to.

The versions of the paper that follow are the versions that were submitted during the peer review process. They are not the versions of record or the final published versions. They should not be cited or distributed as the published version of this manuscript.

BMJ Open is an open access journal and the full, final, typeset and author-corrected version of record of the manuscript is available on our site with no access controls, subscription charges or pay-per-view fees (<http://bmjopen.bmj.com>).

If you have any questions on BMJ Open's open peer review process please email [editorial.bmjopen@bmj.com](mailto:editorial.bmjopen@bmj.com)

# BMJ Open

## Assessment of patient-reported outcomes after a polytrauma: protocol for a systematic review

|                               |                                                                                                                                                                                                                                                                                                                                                                                                                                                                                                                                                                                                                                                                                                                                                                                                                                                                                                                                                                                                                                                                                                                                                                                                                                                                                                                                                                                                                                                                                                                                                                                                                                                                                                      |
|-------------------------------|------------------------------------------------------------------------------------------------------------------------------------------------------------------------------------------------------------------------------------------------------------------------------------------------------------------------------------------------------------------------------------------------------------------------------------------------------------------------------------------------------------------------------------------------------------------------------------------------------------------------------------------------------------------------------------------------------------------------------------------------------------------------------------------------------------------------------------------------------------------------------------------------------------------------------------------------------------------------------------------------------------------------------------------------------------------------------------------------------------------------------------------------------------------------------------------------------------------------------------------------------------------------------------------------------------------------------------------------------------------------------------------------------------------------------------------------------------------------------------------------------------------------------------------------------------------------------------------------------------------------------------------------------------------------------------------------------|
| Journal:                      | <i>BMJ Open</i>                                                                                                                                                                                                                                                                                                                                                                                                                                                                                                                                                                                                                                                                                                                                                                                                                                                                                                                                                                                                                                                                                                                                                                                                                                                                                                                                                                                                                                                                                                                                                                                                                                                                                      |
| Manuscript ID                 | bmjopen-2017-017571                                                                                                                                                                                                                                                                                                                                                                                                                                                                                                                                                                                                                                                                                                                                                                                                                                                                                                                                                                                                                                                                                                                                                                                                                                                                                                                                                                                                                                                                                                                                                                                                                                                                                  |
| Article Type:                 | Protocol                                                                                                                                                                                                                                                                                                                                                                                                                                                                                                                                                                                                                                                                                                                                                                                                                                                                                                                                                                                                                                                                                                                                                                                                                                                                                                                                                                                                                                                                                                                                                                                                                                                                                             |
| Date Submitted by the Author: | 04-May-2017                                                                                                                                                                                                                                                                                                                                                                                                                                                                                                                                                                                                                                                                                                                                                                                                                                                                                                                                                                                                                                                                                                                                                                                                                                                                                                                                                                                                                                                                                                                                                                                                                                                                                          |
| Complete List of Authors:     | Gnass, Irmela ; Heinrich-Heine-University Düsseldorf, Institute for Health Services Research and Health Economics<br>Ritchel, Michaela; Heinrich-Heine-University Düsseldorf, Institute for Health Services Research and Health Economics<br>Andrich, Silke; Heinrich-Heine-University Düsseldorf, Institute for Health Services Research and Health Economics; German Diabetes Centre, Leibniz Centre for Diabetes Research, Heinrich-Heine-University, Institute for Health Services Research and Health Economics<br>Kuske, Silke; Heinrich-Heine-University Düsseldorf, Institute for Health Services Research and Health Economics; German Diabetes Centre, Leibniz Centre for Diabetes Research, Heinrich-Heine-University, Institute for Health Services Research and Health Economics<br>Moschinski, Kai; Heinrich-Heine-University Düsseldorf, Institute for Health Services Research and Health Economics<br>Herrmann-Frank, Annegret; Heinrich-Heine-University Düsseldorf, Institute for Health Services Research and Health Economics<br>Metzendorf, M; Heinrich-Heine University, Cochrane Metabolic and Endocrine Disorders Group, Institute of General Practice<br>Flohé, Sascha; Städtisches Klinikum Solingen; Heinrich-Heine-University Düsseldorf<br>Sturm, Johannes; Academy for Trauma Surgery - AUC<br>Windolf, Joachim; Heinrich-Heine-University Düsseldorf, Department of Trauma and Hand Surgery<br>Icks, Andrea; Heinrich-Heine-University Düsseldorf, Institute for Health Services Research and Health Economics; German Diabetes Centre, Leibniz Centre for Diabetes Research, Heinrich-Heine-University, Institute for Health Services Research and Health Economics |
| Keywords:                     | Patient-reported Outcomes, Quality of Life, Polytrauma, Multiple Trauma, Activities of Daily Living, Social Participation                                                                                                                                                                                                                                                                                                                                                                                                                                                                                                                                                                                                                                                                                                                                                                                                                                                                                                                                                                                                                                                                                                                                                                                                                                                                                                                                                                                                                                                                                                                                                                            |
|                               |                                                                                                                                                                                                                                                                                                                                                                                                                                                                                                                                                                                                                                                                                                                                                                                                                                                                                                                                                                                                                                                                                                                                                                                                                                                                                                                                                                                                                                                                                                                                                                                                                                                                                                      |

SCHOLARONE™  
Manuscripts

**Assessment of patient-reported outcomes after a polytrauma: protocol for a systematic review**

Irmela Gnass\*, Michaela Ritschel\*, Silke Andrich, Silke Kuske, Kai Moschinski, Annegret Herrmann-Frank, Maria-Inti Metzendorf, Sascha Flohé, Johannes Sturm, Joachim Windolf, Andrea Icks

\* Shared first authorship

**Corresponding author**

Michaela Ritschel, Heinrich-Heine-University Düsseldorf, Institute for Health Services Research and Health Economics, Centre for Health and Society (CHS), Medical Faculty, Moorenstraße 5, Gebäude 14.82, 40225 Düsseldorf, e-mail: michaela.ritschel@ddz.uni-duesseldorf.de, phone:+49(0)211-3382404, fax: +49(0)211 81 – 19778

Dr. Irmela Gnass  
Institute for Health Services Research and Health Economics  
Centre for Health and Society (CHS)  
Medical Faculty  
Heinrich-Heine-University Düsseldorf, Düsseldorf, Germany

Michaela Ritschel  
Institute for Health Services Research and Health Economics  
Centre for Health and Society (CHS)  
Medical Faculty  
Heinrich-Heine-University Düsseldorf, Düsseldorf, Germany

Dr. Silke Andrich  
Institute for Health Services Research and Health Economics  
Centre for Health and Society (CHS)  
Medical Faculty  
Heinrich-Heine-University Düsseldorf, Düsseldorf, Germany

Institute for Health Services Research and Health Economics  
German Diabetes Centre, Leibniz Centre for Diabetes Research  
Heinrich-Heine-University Düsseldorf, Düsseldorf, Germany

1  
2  
3 Prof. Dr. Silke Kuske  
4 Institute for Health Services Research and Health Economics  
5 Centre for Health and Society (CHS)  
6 Medical Faculty  
7  
8 Heinrich-Heine-University Düsseldorf, Düsseldorf, Germany  
9

10  
11 Institute for Health Services Research and Health Economics  
12 German Diabetes Centre, Leibniz Centre for Diabetes Research  
13 Heinrich-Heine-University Düsseldorf, Düsseldorf, Germany  
14  
15

16  
17 Kai Moschinski  
18 Institute for Health Services Research and Health Economics  
19 Centre for Health and Society (CHS)  
20 Medical Faculty  
21  
22 Heinrich-Heine-University Düsseldorf, Düsseldorf, Germany  
23  
24

25  
26 PD Dr. Annegret Herrmann-Frank  
27 Institute for Health Services Research and Health Economics  
28 Centre for Health and Society (CHS)  
29 Medical Faculty  
30  
31 Heinrich-Heine-University Düsseldorf, Düsseldorf, Germany  
32  
33

34  
35 Maria-Inti Metzendorf  
36 Cochrane Metabolic and Endocrine Disorders Group  
37 Institute of General Practice  
38 Medical Faculty  
39  
40 Heinrich-Heine-University Düsseldorf, Düsseldorf, Germany  
41  
42

43  
44 Prof. Dr. Sascha Flohé  
45 Klinik für Unfallchirurgie, Orthopädie und Handchirurgie  
46 Städtisches Klinikum Solingen gemeinnützige GmbH, Solingen, Germany  
47  
48  
49  
50 Heinrich-Heine-University Düsseldorf, Düsseldorf, Germany  
51  
52  
53  
54  
55  
56  
57  
58  
59

1  
2  
3 Prof. Dr. Johannes Sturm  
4 AUC – Academie for Trauma Surgery GmbH, München, Germany  
5

6  
7 Prof. Dr. Joachim Windolf  
8 Department of Trauma and Hand Surgery  
9  
10 Medical Faculty  
11 Heinrich-Heine-University Düsseldorf, Düsseldorf, Germany  
12  
13

14 Prof. Dr. Dr. Andrea Icks  
15 Institute for Health Services Research and Health Economics  
16 Centre for Health and Society (CHS)  
17 Medical Faculty  
18 Heinrich-Heine-University Düsseldorf, Düsseldorf, Germany  
19  
20  
21  
22

23 Institute for Health Services Research and Health Economics  
24 German Diabetes Centre, Leibniz Centre for Diabetes Research  
25 Heinrich-Heine-University Düsseldorf, Düsseldorf, Germany  
26  
27  
28

29 **Keywords:** Patient-reported Outcomes, Quality of Life, Polytrauma, Multiple Trauma, Activities of  
30 Daily Living, Social Participation  
31  
32

33  
34 **Word count:** 1.901  
35

36  
37 **Abstract:**

38 Introduction: Survivors of polytrauma experience long- and short-term burden that influence their  
39 quality of life. The patients' view of relevant short and long-term outcomes should be captured in  
40 instruments that measure quality of life and other patient-reported outcomes (PROs) after a  
41 polytrauma. The aim of this systematic review is to (1) collect instruments that assess patient-reported  
42 outcomes (e.g. quality of life) during the follow-up after a polytrauma, (2) describe the instrument's  
43 application (e.g. duration period of follow-up), and (3) investigate other relevant patient-reported  
44 outcomes that are additionally assessed in the included studies (e.g. activities of daily living).  
45  
46  
47  
48

49  
50 Methods and analysis: The systematic review protocol will be performed in line with the PRISMA-P  
51 statement. MEDLINE, EMBASE, CINAHL, PsycINFO, Cochrane Central Register of Controlled  
52 Trials (CENTRAL) and the trials registers ClinicalTrials.gov and WHO ICTRP will be searched.  
53 Keywords, e.g., "polytrauma", "multiple trauma", "quality of life", "activities of daily living" or "pain"  
54 will be used. Publications published from 2005 until August 2016 will be included. The data  
55  
56  
57  
58  
59  
60

1  
2  
3 extraction and a content analysis will be carried out systematically. A critical appraisal will be  
4 performed.  
5

6 Ethics and Dissemination: Formal ethical approval is not required as primary data will not be  
7 collected. The results will be published in a peer-reviewed publication. The systematic review was  
8 registered at PROSPERO (registration number CRD42017060825).  
9  
10

### 11 **Strengths and limitations of this study**

- 12 • To the best of our knowledge, there are no systematic reviews in the literature that provide an  
13 overview about the assessed patient-reported outcomes after polytrauma and therefor applied  
14 instruments.
- 15 • The systematic review will also display the times of measurement and follow up periods for  
16 identified quality of life measures.
- 17 • We will show additional measure for further relevant patient-reported outcomes after polytrauma,  
18 e. g. social participation, activities of daily living.
- 19 • A limitation of the review might be that publications will be included which are published since  
20 2005. It cannot be ruled out in that case that relevant literature published before 2005 is missing.  
21  
22  
23  
24  
25  
26  
27  
28  
29

### 30 **Introduction**

31  
32 Severe injuries represent a leading cause of death and permanent disability [1]. Especially in the  
33 central European region such severely injured patients are termed as “polytrauma patients” or  
34 “polytraumatised”. Actually, “polytrauma” is defined as having at least two severe injuries in different  
35 body regions that are potentially life-threatening. In the Anglo-American literature these patients are  
36 mostly entitled as “multiple injury”, “multiple trauma” or “severely injured patients”. All these  
37 descriptions have in common, that a certain degree of injury is mandatory. The severity of the trauma  
38 is indicated by the Injury Severity Score (ISS). In general, an  $ISS \geq 16$  indicating the severity of a  
39 trauma is included in the description of “polytrauma” or “multiple trauma” or “severely injured”  
40 patients [1, 2] In the following we refer to the term „polytrauma“.  
41  
42  
43  
44  
45

46 In Germany the number of severely multiply injured patients counts up to approximately 18.400  
47 patients per year, mostly males (72%) [2] with a mean age of 45.9 years [3].  
48  
49

50 Due to strategies for early advanced life support, high quality in health care services, progress in  
51 treatment options and more traffic safety the survival rate after polytrauma is increasing. However,  
52 survivors are faced with long- and short-term burden after polytrauma: after one year polytrauma  
53 patients are still suffering from remaining problems in mobility (34%), self-care (15%) and activities  
54 of daily living (51%) [4]. Furthermore, they experience pain and/or discomfort (58%) as well as  
55 anxiety and/or depression (37%) [3]. Relevant disabilities, like respiration limitations, para- or  
56  
57  
58  
59  
60

1  
2  
3 tetraplegia are severe causes for 40% not returning to their former workplace [3,5, 6] and have impact  
4 on socio-economical and quality of life aspects [5-8]. For the necessary acute and rehabilitative care  
5 the social economic impact is estimated to be 106.000 € per patient. In Germany additional costs of  
6 935.000 € accrue if patients are not returning to their former workplace [6].  
7  
8

9  
10 Consequently, the aim to reduce short- and long-term burden after polytrauma is essentially important  
11 [6, 8]. Thereby clinical parameters are necessary to support treatment processes and services in acute  
12 care facilities and to display short-term outcomes. Additionally, measures capturing the patients' view  
13 of short and long-term outcomes regarding e.g. psychological and physical factors, functioning status  
14 and social interaction are becoming more and more important for doctors and nurses as well as for  
15 patients and their relatives [8, 9]. The measurement of these patient-reported outcomes (PROs), which  
16 can also be reported e.g. by relatives in case of mental disability, are important for completing the  
17 assessment of relevant clinical outcomes after injury. To assess the impact of a polytrauma on quality  
18 of life and other relevant PROs it is necessary to question the patients [9, 10]. As preferred gold  
19 standard follow up questioning as repeated snapshots of outcomes would track trends and focus on  
20 long-term conditions and outcomes after polytrauma [10]. Therefore, it is necessary to know which  
21 instruments for assessing PROs are applied and how. Thus, this systematic review will provide an  
22 overview of instruments used to measure PROs, like quality of life, and other currently reported  
23 outcome measures for patients with polytrauma and describe their application in detail.  
24  
25  
26  
27  
28  
29  
30

31 Currently the TraumaRegister (DGU<sup>®</sup>) collects data on emergency care, treatment in the shock rooms,  
32 intensive care unit (ICU) and discharge [2, 9]. In respect of the comprehensive evaluation of the short  
33 and long-term burden the register plans to expand their measurement battery by assessing patient-  
34 reported outcomes, e.g. quality of life.  
35  
36  
37

### 38 **Aim of the study**

39  
40 The aim of this systematic review is to

- 41  
42 1. collect instruments that assess patient-reported outcomes (e.g. quality of life, participation,  
43 activities of daily living) during the follow-up after a polytrauma and
- 44  
45 2. describe the instrument's application (e.g. duration period of follow-up, frequency of application,  
46 time of measurements during follow-up)
- 47  
48 3. investigate other relevant patient-reported outcomes that are additionally assessed in the included  
49 studies (e.g. activities of daily living, social participation, pain, depression, anxiety, cognitive  
50 function)  
51  
52  
53  
54  
55  
56  
57  
58  
59  
60

## Method

The systematic review protocol was performed in line with the quality requirements of the PRISMA-P statement [11] and PRISMA Statement will be considered during the review procedure [12]. It was registered on 8 April 2017 at PROSPERO (registration number CRD42017060825).

### *Databases*

The literature search will be conducted in the following databases: MEDLINE, EMBASE, CINAHL, PsycINFO, Cochrane Central Register of Controlled Trials (CENTRAL) and the trials registers ClinicalTrials.gov and WHO ICTRP. To ensure literature saturation reference lists of eligible studies will be examined for further relevant publications.

### *Search strategy*

The search strategy will be developed in cooperation with an information specialist using database-specific controlled vocabulary and additional free text terms. Appendix A provides the Medline search strategy which will be adapted to the other databases accordingly.

### *Inclusion and exclusion criteria*

Studies will be included if they match following inclusion criteria: i) the study assesses patient-reported outcomes, like quality of life (QoL)/health-related quality of life (HRQoL), participation, activities of daily living (ADL), pain, depression, anxiety or cognitive function in people aged 18-75 years during a temporally clear defined follow-up period after a polytrauma (at least two injuries, ISS >15, AIS $\geq$ 3); ii) original qualitative, quantitative, mixed methods studies and randomized controlled trial studies (RCT) which are published between 2005 and 2016; iii) publications are in English or German language will be considered, iv) the full text of the study is available (e. g. contacting the authors).

Studies will be excluded from this review if they mention one of the following criteria: i) an injury-severity-score (ISS)  $\leq$  15 or an abbreviated injury scale (AIS) <3 or no reporting of ISS or AIS; ii) low-energy injuries, single or mono injuries or geriatric injuries, burn injuries, war injuries (group of veterans or military staff are excluded), cancer and other chronic diseases as secondary diagnosis; iii) publications where the primary aim does not focus on patient-reported outcomes iv) grey literature, books, letters/short reports, abstracts, editorials, comments or discussion papers as well as case studies, systematic reviews and meta-analysis. However, the two latter will be screened to identify further appropriate studies.

### *Study selection process*

On the basis of predefined in- and exclusion criteria suitable publications will be selected by title and abstract, independently screened by two reviewers. A third reviewer will solve differences concerning



1  
2  
3 the in- or exclusion of studies. In order to foster the process of suitability decisions, in- and exclusion  
4 of the first fifty publications by title and abstract screening will be discussed between the two  
5 reviewers. Subsequently, two reviewers assessing eligibility for final inclusion in this review will  
6 screen the full texts of the remaining publications again independently. A third reviewer will solve  
7 conflicts in the final in- or exclusion of studies. Inter-rater reliability will be determined after the title-  
8 abstract as well as after the full text screening.  
9

### 10 11 12 ***Data extraction and synthesis*** 13

14 The data extraction will be performed according to the requirements of Cochrane reviews [13]. For  
15 data extraction two experienced researchers will use a piloted data extraction sheet independently.  
16 Extracted data from the included studies will give an overview of: first author and publication year,  
17 study design, country, study population (number of subjects, proportion of men, mean age with  
18 standard deviation and range, kind of injury, ISS, AIS, other characteristics), treatment, aim of the  
19 study, findings, and furthermore the reported PROs, applied instruments to assess these PROs,  
20 description of the instrument, data collection (method of assessment, time of measurements, length of  
21 follow-up period, quality criteria of instruments (e.g. validity, reliability) and modifications of the  
22 instruments. Furthermore, the result of the critical appraisal of the study quality will be added.  
23  
24  
25  
26  
27

### 28 29 ***Critical appraisal*** 30

31 In the final selection of eligible studies two reviewers will independently perform a quality appraisal  
32 to assess the methodological quality and the risk of bias in each study type using standardised  
33 checklists of the National Institute for Health and Care Excellence (NICE) [14], Checklist of the  
34 Scottish Intercollegiate Guidelines Network (SIGN) [15] or the Mixed Method Appraisal Tool  
35 (MMAT) [16]. Reviewers will resolve disagreements by discussion.  
36  
37  
38  
39

### 40 41 **Discussion**

42 We will perform the proposed systematic review to generate an overview of the instruments used to  
43 assess PROs in the field of polytrauma. The results of this systematic review serve as a basis to expand  
44 the TraumaRegister DGU® with focus on quality of life measures. Likewise, might the additional  
45 knowledge on further patient-reported outcomes, e. g. social participation and activities of daily living  
46 expand the view from the patients' perspectives on relevant outcomes after polytrauma and lead its  
47 adaptation on health services. Subsequently, health care providers and policymakers may draw their  
48 attention on this topic and will implement the assessment of PROs in decision-making regarding the  
49 treatment process.  
50  
51  
52  
53  
54  
55  
56  
57  
58  
59  
60

### **Contributorship statement**

AI is the guarantor. IG, MR, SA, SK and AI drafted the manuscript. IG, MR, AHF, MIM, SA and SK developed the search strategy. All authors contributed to the development of the selection criteria, the risk of bias assessment strategy and data extraction criteria. All authors read, provided feedback and approved the final manuscript.

### **Competing interests**

Johannes Sturm is executive secretary of the AUC. The authors declare that they have no competing interests.

### **Funding**

This systematic review is funded by the Academy for Trauma Surgery (AUC). The funding will support the conduct of this systematic review.

### **Data sharing statement**

There will be no additional unpublished data.

### **Consent for publication**

All authors have approved the manuscript for submission. The content of the manuscript has not been published, or submitted for publication elsewhere.

### **Ethics committee approval information**

Since this is a protocol for a systematic review, which will be based on published data and, as such, ethical approval is not required.

## References

1. Ringburg AN, Polinder S, van Lerland MC, Leyerberg EW, van Lieshout EM, Paka P, van Beeck EF and IB Schipper, Prevalence and prognostic factors of disability after major trauma. *J Trauma*, 2011. 70(4): p. 916-22
2. DGU (Deutsche Gesellschaft für Unfallchirurgie e. V.), Weißbuch Schwerverletztenversorgung. 2. ed. 2014, Berlin: Thieme
3. Debus F, Lefering R, Frink M, Kühne CA, Mand C, Bücking B, Rucholz S, and TraumaRegisterDGU®, Anzahl der Schwerverletzten in Deutschland [Numbers of Severely Injured Patients in Germany]. *Deutsches Ärzteblatt [International]*, 2015. [1]12(49): p. 823-829
4. Vles WJ, Steyerberg EM, Essink-Bot MI, van Beeck EF, Meeuwis JD and LP Leenen, Prevalence and determinants of disabilities and return to work after major trauma. *Journal of Trauma*, 2005. 58(1): p. 126-135.
5. Stürmer M and E Neugebauer, S3\_Polytrauma\_Schwerverletzten-Behandlung, D.G.f. Unfallchirurgie, Editor. 2015: AWMF Online
6. Hayes J, Black NA, Jenkinson C, Young JD, Rowan KM, Daly K, and S Ridley, Outcome measures for adult critical care: a systematic review. *HTA Programme*, 2000
7. Häusler JM, Tobler B, Arnet B, Huesler J, and H Zimmermann, Pilot study on the comprehensive economic costs of major trauma: Consequential costs are well in excess of medical costs. *Journal of Trauma*, 2006. 61(723-731)
8. Post RB, van der Sluis CK and HJ Ten Duis, Return to work and quality of life in severely injured patients. *Disability and Rehabilitation*, 2006. 28(22): p. 1399-1404
9. Sittaro NA, Lohse R, Panzica M, Probst C, Pape HC and C Krettek, Hannover-Polytrauma-Long-term-Study HPLS (II). *Versicherungsmedizin*, 2007. 59(2): p. 81-87
10. Ardolino A, Sleat G and K Willett, Outcome measurements in major trauma--results of a consensus meeting. *Injury*, 2012. 43(10): p. 1662-6
11. Moher D, Shamseer L, Clarke M Ghera D, Liberati A, Petticrew M, Shekelle P, Stewart L and The PRISMA-P Group, Preferred reporting items for systematic review and meta-analysis protocols (PRISMA-P) 2015 statement. *Systematic Review*, 2015. 4(1): p. 1-9
12. Moher D, Liberati, A, Tetzlaff J, Altman DG and The PRISMA Group. Preferred Reporting Items for Systematic Reviews and Meta Analyses: The PRISMA Statement. *Open Medicine*, 2009, 3(3): 123-130
13. The Cochrane Collaboration, *The Cochrane Handbook for Systematic Reviews of Interventions*. Version 5.1.0., 2011, The Cochrane Collaboration: <http://handbook.cochrane.org>
14. NICE (National Institute for Health and Care Excellence). *Methods for the development of NICE public health guidance*

- 1  
2  
3 <https://www.nice.org.uk/article/pmg4/chapter/1%20introduction2012>, download 11.11.2016.
- 4 15. SIGN (Scottish Intercollegiate Guidelines Network) Methodology Checklist 5: Diagnostic  
5 studies. <http://www.sign.ac.uk/methodology/checklists.html>, download 8.12.2016
- 6  
7 16. Pace R, Pluye P, Bartlett G, Macaulay AC, Salsberg J, Jagosh J and R Seller, Testing the  
8 reliability and efficiency of the pilot Mixed Methods Appraisal Tool (MMAT) for systematic  
9 mixed studies review. *International Journal of Nursing Studies*, 2012. 49: p. 47-53
- 10  
11  
12  
13  
14  
15  
16  
17  
18  
19  
20  
21  
22  
23  
24  
25  
26  
27  
28  
29  
30  
31  
32  
33  
34  
35  
36  
37  
38  
39  
40  
41  
42  
43  
44  
45  
46  
47  
48  
49  
50  
51  
52  
53  
54  
55  
56  
57  
58  
59  
60

## Appendix A

Medline (PubMed, 03.08.2016)

#1

"Multiple Trauma"[mh] OR multiple trauma\*[tw] OR polytrauma\*[tw]

#2

"Quality of Life"[mh] or "quality of life"[tw] or "life quality"[tw] OR QoL[tw] OR HRQoL[tw] OR satisf\*[tw] OR "self reported health"[tw] OR "Activities of Daily Living"[mh] OR "activities of daily living"[tw] OR "daily living activity"[tw] OR "daily living activities"[tw] OR "activity of daily living"[tw] OR "limitation of activity"[tw] OR "self care"[tw] OR "physical functioning"[tw] OR functional abilit\*[tw] OR "functional assessment"[tw] OR "Social Participation"[mh] OR "social participation"[tw] OR social activit\*[tw] OR "social functioning"[tw] OR "social interaction"[tw] OR "social isolation"[tw] OR "social integration"[tw] OR "Pain"[mh] OR pain[tw] OR "Depression"[mh] OR "Depressive Disorder"[mh] OR depress\*[tw] OR "emotional distress"[tw] OR "Stress, Psychological"[mh] OR stress[tw] OR "Anxiety"[mh] OR anxiet\*[tw] OR "Independent Living"[mh] OR "independent living"[tw] OR "community dwelling"[tw] OR "wellbeing"[tw] OR "well being"[tw] OR "Cognition Disorders"[mh] OR cognitive function\*[tw] OR "mental health"[tw] OR "cognitive impairment"[tw] OR "Patient Outcome Assessment"[mh] OR "patient reported outcome"[tw] OR "patient reported outcomes"[tw] OR "patient related outcome"[tw] OR "patient related outcomes"[tw] OR "patient centered outcomes"[tw] OR "patient centered outcome"[tw] OR rehabilitation outcome\*[tw] OR "Work Capacity Evaluation"[mh] OR "work capacity"[tw] OR "occupational function"[tw] OR "Stress Disorders, Post-Traumatic"[mh] OR PTSD[tw] OR "traumatic stress disorder"[tw] OR "posttraumatic stress disorder"[tw]

#3

#1 AND #2

#4

#3 AND Filters: Publication date from 2005/01/01 to 2016/12/31; English; German

= 836

**PRISMA-P (Preferred Reporting Items for Systematic review and Meta-Analysis Protocols) 2015 checklist: recommended items to address in a systematic review protocol\***

| Section and topic                 | Item No | Checklist item                                                                                                                                                                                                                | Check        |
|-----------------------------------|---------|-------------------------------------------------------------------------------------------------------------------------------------------------------------------------------------------------------------------------------|--------------|
| <b>ADMINISTRATIVE INFORMATION</b> |         |                                                                                                                                                                                                                               | <b>Check</b> |
| Title:                            |         |                                                                                                                                                                                                                               |              |
| Identification                    | 1a      | Identify the report as a protocol of a systematic review                                                                                                                                                                      | Yes          |
| Update                            | 1b      | If the protocol is for an update of a previous systematic review, identify as such                                                                                                                                            | NA           |
| Registration                      | 2       | If registered, provide the name of the registry (such as PROSPERO) and registration number                                                                                                                                    | Yes          |
| Authors:                          |         |                                                                                                                                                                                                                               |              |
| Contact                           | 3a      | Provide name, institutional affiliation, e-mail address of all protocol authors; provide physical mailing address of corresponding author                                                                                     | Yes          |
| Contributions                     | 3b      | Describe contributions of protocol authors and identify the guarantor of the review                                                                                                                                           | Yes          |
| Amendments                        | 4       | If the protocol represents an amendment of a previously completed or published protocol, identify as such and list changes; otherwise, state plan for documenting important protocol amendments                               | NA           |
| Support:                          |         |                                                                                                                                                                                                                               |              |
| Sources                           | 5a      | Indicate sources of financial or other support for the review                                                                                                                                                                 | Yes          |
| Sponsor                           | 5b      | Provide name for the review funder and/or sponsor                                                                                                                                                                             | Yes          |
| Role of sponsor or funder         | 5c      | Describe roles of funder(s), sponsor(s), and/or institution(s), if any, in developing the protocol                                                                                                                            | Yes          |
| <b>INTRODUCTION</b>               |         |                                                                                                                                                                                                                               |              |
| Rationale                         | 6       | Describe the rationale for the review in the context of what is already known                                                                                                                                                 | Yes          |
| Objectives                        | 7       | Provide an explicit statement of the question(s) the review will address with reference to participants, interventions, comparators, and outcomes (PICO)                                                                      | Yes          |
| <b>METHODS</b>                    |         |                                                                                                                                                                                                                               |              |
| Eligibility criteria              | 8       | Specify the study characteristics (such as PICO, study design, setting, time frame) and report characteristics (such as years considered, language, publication status) to be used as criteria for eligibility for the review | Yes          |
| Information sources               | 9       | Describe all intended information sources (such as electronic databases, contact with study authors, trial registers or other grey literature sources) with planned dates of coverage                                         | Yes          |
| Search strategy                   | 10      | Present draft of search strategy to be used for at least one electronic database, including planned limits, such that it could be repeated                                                                                    | Yes          |

1  
2  
3  
4  
5  
6  
7  
8  
9  
10  
11  
12  
13  
14  
15  
16  
17  
18  
19  
20  
21  
22  
23  
24  
25  
26  
27  
28  
29  
30  
31  
32  
33  
34  
35  
36  
37  
38  
39  
40  
41  
42  
43  
44  
45  
46  
47

|                                    |     |                                                                                                                                                                                                                                                  |     |
|------------------------------------|-----|--------------------------------------------------------------------------------------------------------------------------------------------------------------------------------------------------------------------------------------------------|-----|
| Study records:                     |     |                                                                                                                                                                                                                                                  |     |
| Data management                    | 11a | Describe the mechanism(s) that will be used to manage records and data throughout the review                                                                                                                                                     | Yes |
| Selection process                  | 11b | State the process that will be used for selecting studies (such as two independent reviewers) through each phase of the review (that is, screening, eligibility and inclusion in meta-analysis)                                                  | Yes |
| Data collection process            | 11c | Describe planned method of extracting data from reports (such as piloting forms, done independently, in duplicate), any processes for obtaining and confirming data from investigators                                                           | Yes |
| Data items                         | 12  | List and define all variables for which data will be sought (such as PICO items, funding sources), any pre-planned data assumptions and simplifications                                                                                          | Yes |
| Outcomes and prioritization        | 13  | List and define all outcomes for which data will be sought, including prioritization of main and additional outcomes, with rationale                                                                                                             | Yes |
| Risk of bias in individual studies | 14  | Describe anticipated methods for assessing risk of bias of individual studies, including whether this will be done at the outcome or study level, or both; state how this information will be used in data synthesis                             | Yes |
| Data synthesis                     | 15a | Describe criteria under which study data will be quantitatively synthesised                                                                                                                                                                      | NA  |
|                                    | 15b | If data are appropriate for quantitative synthesis, describe planned summary measures, methods of handling data and methods of combining data from studies, including any planned exploration of consistency (such as $I^2$ , Kendall's $\tau$ ) | NA  |
|                                    | 15c | Describe any proposed additional analyses (such as sensitivity or subgroup analyses, meta-regression)                                                                                                                                            | NA  |
|                                    | 15d | If quantitative synthesis is not appropriate, describe the type of summary planned                                                                                                                                                               | NA  |
| Meta-bias(es)                      | 16  | Specify any planned assessment of meta-bias(es) (such as publication bias across studies, selective reporting within studies)                                                                                                                    | NA  |
| Confidence in cumulative evidence  | 17  | Describe how the strength of the body of evidence will be assessed (such as GRADE)                                                                                                                                                               | NA  |

**\* It is strongly recommended that this checklist be read in conjunction with the PRISMA-P Explanation and Elaboration (cite when available) for important clarification on the items. Amendments to a review protocol should be tracked and dated. The copyright for PRISMA-P (including checklist) is held by the PRISMA-P Group and is distributed under a Creative Commons Attribution Licence 4.0.**

*From: Shamseer L, Moher D, Clarke M, Ghersi D, Liberati A, Petticrew M, Shekelle P, Stewart L, PRISMA-P Group. Preferred reporting items for systematic review and meta-analysis protocols (PRISMA-P) 2015: elaboration and explanation. BMJ. 2015 Jan 2;349(jan02 1):g7647.*

# BMJ Open

## Assessment of patient-reported outcomes after polytrauma: protocol for a systematic review

|                                 |                                                                                                                                                                                                                                                                                                                                                                                                                                                                                                                                                                                                                                                                                                                                                                                                                                                                                                                                                                                                                                                                                                                                                                                                                                                                                                                                                                                                                                                                                                                                                                                                                                                                                                      |
|---------------------------------|------------------------------------------------------------------------------------------------------------------------------------------------------------------------------------------------------------------------------------------------------------------------------------------------------------------------------------------------------------------------------------------------------------------------------------------------------------------------------------------------------------------------------------------------------------------------------------------------------------------------------------------------------------------------------------------------------------------------------------------------------------------------------------------------------------------------------------------------------------------------------------------------------------------------------------------------------------------------------------------------------------------------------------------------------------------------------------------------------------------------------------------------------------------------------------------------------------------------------------------------------------------------------------------------------------------------------------------------------------------------------------------------------------------------------------------------------------------------------------------------------------------------------------------------------------------------------------------------------------------------------------------------------------------------------------------------------|
| Journal:                        | <i>BMJ Open</i>                                                                                                                                                                                                                                                                                                                                                                                                                                                                                                                                                                                                                                                                                                                                                                                                                                                                                                                                                                                                                                                                                                                                                                                                                                                                                                                                                                                                                                                                                                                                                                                                                                                                                      |
| Manuscript ID                   | bmjopen-2017-017571.R1                                                                                                                                                                                                                                                                                                                                                                                                                                                                                                                                                                                                                                                                                                                                                                                                                                                                                                                                                                                                                                                                                                                                                                                                                                                                                                                                                                                                                                                                                                                                                                                                                                                                               |
| Article Type:                   | Protocol                                                                                                                                                                                                                                                                                                                                                                                                                                                                                                                                                                                                                                                                                                                                                                                                                                                                                                                                                                                                                                                                                                                                                                                                                                                                                                                                                                                                                                                                                                                                                                                                                                                                                             |
| Date Submitted by the Author:   | 20-Oct-2017                                                                                                                                                                                                                                                                                                                                                                                                                                                                                                                                                                                                                                                                                                                                                                                                                                                                                                                                                                                                                                                                                                                                                                                                                                                                                                                                                                                                                                                                                                                                                                                                                                                                                          |
| Complete List of Authors:       | Gnass, Irmela ; Heinrich-Heine-University Düsseldorf, Institute for Health Services Research and Health Economics<br>Ritchel, Michaela; Heinrich-Heine-University Düsseldorf, Institute for Health Services Research and Health Economics<br>Andrich, Silke; Heinrich-Heine-University Düsseldorf, Institute for Health Services Research and Health Economics; German Diabetes Centre, Leibniz Centre for Diabetes Research, Heinrich-Heine-University, Institute for Health Services Research and Health Economics<br>Kuske, Silke; Heinrich-Heine-University Düsseldorf, Institute for Health Services Research and Health Economics; German Diabetes Centre, Leibniz Centre for Diabetes Research, Heinrich-Heine-University, Institute for Health Services Research and Health Economics<br>Moschinski, Kai; Heinrich-Heine-University Düsseldorf, Institute for Health Services Research and Health Economics<br>Herrmann-Frank, Annegret; Heinrich-Heine-University Düsseldorf, Institute for Health Services Research and Health Economics<br>Metzendorf, M; Heinrich-Heine University, Cochrane Metabolic and Endocrine Disorders Group, Institute of General Practice<br>Flohé, Sascha; Städtisches Klinikum Solingen; Heinrich-Heine-University Düsseldorf<br>Sturm, Johannes; Academy for Trauma Surgery - AUC<br>Windolf, Joachim; Heinrich-Heine-University Düsseldorf, Department of Trauma and Hand Surgery<br>Icks, Andrea; Heinrich-Heine-University Düsseldorf, Institute for Health Services Research and Health Economics; German Diabetes Centre, Leibniz Centre for Diabetes Research, Heinrich-Heine-University, Institute for Health Services Research and Health Economics |
| <b>Primary Subject Heading</b>: | Health services research                                                                                                                                                                                                                                                                                                                                                                                                                                                                                                                                                                                                                                                                                                                                                                                                                                                                                                                                                                                                                                                                                                                                                                                                                                                                                                                                                                                                                                                                                                                                                                                                                                                                             |
| Secondary Subject Heading:      | Patient-centred medicine                                                                                                                                                                                                                                                                                                                                                                                                                                                                                                                                                                                                                                                                                                                                                                                                                                                                                                                                                                                                                                                                                                                                                                                                                                                                                                                                                                                                                                                                                                                                                                                                                                                                             |
| Keywords:                       | Patient-reported Outcomes, Quality of Life, Polytrauma, Multiple Trauma, Activities of Daily Living, Social Participation                                                                                                                                                                                                                                                                                                                                                                                                                                                                                                                                                                                                                                                                                                                                                                                                                                                                                                                                                                                                                                                                                                                                                                                                                                                                                                                                                                                                                                                                                                                                                                            |
|                                 |                                                                                                                                                                                                                                                                                                                                                                                                                                                                                                                                                                                                                                                                                                                                                                                                                                                                                                                                                                                                                                                                                                                                                                                                                                                                                                                                                                                                                                                                                                                                                                                                                                                                                                      |



1  
2  
3  
4  
5  
6  
7  
8  
9  
10  
11  
12  
13  
14  
15  
16  
17  
18  
19  
20  
21  
22  
23  
24  
25  
26  
27  
28  
29  
30  
31  
32  
33  
34  
35  
36  
37  
38  
39  
40  
41  
42  
43  
44  
45  
46  
47  
48  
49  
50  
51  
52  
53  
54  
55  
56  
57  
58  
59  
60

For peer review only

## Assessment of patient-reported outcomes after polytrauma: protocol for a systematic review

Irmela Gnass\*, Michaela Ritschel\*, Silke Andrich, Silke Kuske, Kai Moschinski, Annegret Herrmann-Frank, Maria-Inti Metzendorf, Sascha Flohé, Johannes Sturm, Joachim Windolf, Andrea Icks

\* Shared first authorship

### Corresponding author

Michaela Ritschel, Heinrich-Heine University Düsseldorf, Institute for Health Services Research and Health Economics, Centre for Health and Society (CHS), Medical Faculty, Moorenstraße 5, Gebäude 14.82, 40225 Düsseldorf, e-mail: michaela.ritschel@hhu.de, phone: +49 (0)211 338 2404, fax: +49 (0)211 811 9778

Irmela Gnass  
Institute for Health Services Research and Health Economics  
Centre for Health and Society  
Medical Faculty  
Heinrich-Heine University Düsseldorf, Düsseldorf, Germany

Michaela Ritschel  
Institute for Health Services Research and Health Economics  
Centre for Health and Society  
Medical Faculty  
Heinrich-Heine University Düsseldorf, Düsseldorf, Germany

Silke Andrich  
Institute for Health Services Research and Health Economics  
Centre for Health and Society  
Medical Faculty  
Heinrich-Heine University Düsseldorf, Düsseldorf, Germany

Institute for Health Services Research and Health Economics  
German Diabetes Centre, Leibniz Centre for Diabetes Research  
Heinrich-Heine University Düsseldorf, Düsseldorf, Germany

1  
2  
3 Silke Kuske  
4 Institute for Health Services Research and Health Economics  
5 Centre for Health and Society  
6 Medical Faculty  
7  
8 Heinrich-Heine University Düsseldorf, Düsseldorf, Germany  
9

10  
11 Institute for Health Services Research and Health Economics  
12 German Diabetes Centre, Leibniz Centre for Diabetes Research  
13 Heinrich-Heine University Düsseldorf, Düsseldorf, Germany  
14  
15

16  
17 Kai Moschinski  
18 Institute for Health Services Research and Health Economics  
19 Centre for Health and Society  
20 Medical Faculty  
21  
22 Heinrich-Heine-University Düsseldorf, Düsseldorf, Germany  
23  
24

25  
26 Annegret Herrmann-Frank  
27 Institute for Health Services Research and Health Economics  
28 Centre for Health and Society  
29 Medical Faculty  
30  
31 Heinrich-Heine University Düsseldorf, Düsseldorf, Germany  
32  
33

34  
35 Maria-Inti Metzendorf  
36 Cochrane Metabolic and Endocrine Disorders Group  
37 Institute of General Practice  
38 Medical Faculty  
39  
40 Heinrich-Heine University Düsseldorf, Düsseldorf, Germany  
41  
42

43  
44 Sascha Flohé  
45 Klinik für Unfallchirurgie, Orthopädie und Handchirurgie  
46 Städtisches Klinikum Solingen gemeinnützige GmbH, Solingen, Germany  
47  
48  
49  
50 Heinrich-Heine University Düsseldorf, Düsseldorf, Germany  
51  
52

1  
2  
3 Johannes Sturm  
4 Academie for Trauma Surgery GmbH, München, Germany  
5

6  
7 Joachim Windolf  
8 Department of Trauma and Hand Surgery  
9  
10 Medical Faculty  
11 Heinrich-Heine University Düsseldorf, Düsseldorf, Germany  
12  
13

14  
15 Andrea Icks  
16 Institute for Health Services Research and Health Economics  
17 Centre for Health and Society  
18  
19 Medical Faculty  
20 Heinrich-Heine University Düsseldorf, Düsseldorf, Germany  
21  
22

23  
24 Institute for Health Services Research and Health Economics  
25 German Diabetes Centre, Leibniz Centre for Diabetes Research  
26  
27 Heinrich-Heine University Düsseldorf, Düsseldorf, Germany  
28

29  
30 **Keywords:** patient-reported outcomes, quality of life, polytrauma, multiple trauma, activities of daily  
31 living, social participation  
32

33  
34 **Word count:** 2,108  
35

36  
37 **Abstract:**

38  
39 Introduction: Survivors of polytrauma experience long- and short-term burden that influences their  
40 lives. The patients' view of relevant short- and long-term outcomes should be captured in instruments  
41 that measure quality of live and other patient-reported outcomes (PROs) after a polytrauma. The aim  
42 of this systematic review is to i) collect instruments that assess patient-reported outcomes (quality of  
43 life, social participation, activities of daily living) during follow-up after polytrauma, ii) describe the  
44 instruments' application (e.g. duration of period of follow-up), and iii) investigate other relevant  
45 patient-reported outcomes that are also assessed in the included studies (pain, depression, anxiety,  
46 cognitive function).  
47  
48  
49  
50

51  
52 Methods and analysis: The systematic review protocol is developed in line with the PRISMA-P  
53 statement. MEDLINE, EMBASE, CINAHL, PsycINFO, Cochrane Central Register of Controlled  
54 Trials (CENTRAL) and the trials registers ClinicalTrials.gov and WHO ICTRP will be searched.  
55  
56 Keywords, e.g. 'polytrauma', 'multiple trauma', 'quality of life', 'activities of daily living' or 'pain'  
57 will be used. Publications published between January 2005 and August 2016 will be included. The  
58  
59

1  
2  
3 data extraction and a content analysis will be carried out systematically. A critical appraisal will be  
4 performed.  
5

6 Ethics and Dissemination: Formal ethical approval is not required as primary data will not be  
7 collected. The results will be published in a peer-reviewed publication. The systematic review is  
8 registered at PROSPERO (registration number CRD42017060825).  
9  
10

### 11 **Strengths and limitations of this study**

- 12 • To the best of our knowledge, there are no published systematic reviews providing an overview of
- 13 assessed patient-reported outcomes after polytrauma, different instruments used to measure these
- 14 as well as the application of these instruments.
- 15 • This systematic review will report the identified instruments used to assess quality of life, social
- 16 participation and activities of daily living, and describe their application.
- 17 • We will show to a lesser extent additional measures for further relevant patient-reported outcomes
- 18 following polytrauma, e.g. pain, depression, anxiety, cognitive function.
- 19 • A limitation of the review might be that publications will be included which were published since
- 20 2005. It cannot be ruled out in that case that relevant literature published before 2005 is missing.  
21  
22  
23  
24  
25  
26  
27  
28  
29

### 30 **Introduction**

31 Severe injuries represent a leading cause of death and permanent disability [1]. Especially in the  
32 central European region, such severely injured patients are termed as ‘polytrauma patients’ or as being  
33 ‘polytraumatised’. ‘Polytrauma’ is defined as having at least two severe injuries in different body  
34 regions that are potentially life-threatening. In the Anglo-American literature these patients are mostly  
35 referred to as ‘multiple-injury’, ‘multiple-trauma’ or ‘severely injured’. All these descriptions have in  
36 common that a certain degree of injury is required. The severity of trauma is usually indicated by the  
37 Injury Severity Score (ISS) [2]. In general, an  $ISS \geq 16$  falls within the definition of polytrauma,  
38 multiple-trauma or severely injured patients [1, 3]. In the following we use the term polytrauma.  
39 Comparing the incidence of trauma is challenging, considering the different definitions or conditions  
40 of trauma, and due to inconsistencies in the available data [4]. In 2015, according to the  
41 TraumaRegister DGU<sup>®</sup>, the number of severely multiply injured patients was 17,630 ( $ISS \geq 16$ ) [5]. In  
42 2012 the number of severely multiply injured patients ( $ISS \geq 16$ ) reached approximately 18,400 per  
43 year. This corresponds to a cumulative incidence of 0.02% per year for Germany [6]. Persons affected  
44 are mostly male (72%) with a mean age of 46.5 years [7].  
45  
46  
47  
48  
49  
50  
51  
52

53 Due to strategies for early advanced life support, high quality in healthcare services, progress in  
54 treatment options and more traffic safety, survival rates after polytrauma are increasing. However,  
55 survivors are faced with long- and short-term burden after polytrauma: one year after polytrauma,  
56  
57  
58  
59  
60

1  
2  
3 patients continue to suffer from persisting problems with mobility (34%), self-care (15%) and  
4 activities of daily living (51%). Furthermore, they experience pain and/or discomfort (58%) as well as  
5 anxiety and/or depression (37%) [8]. Relevant disabilities, such as respiration limitations, para- or  
6 tetraplegia, are major causes for 40% of those affected not returning to their former workplace [6, 9,  
7 10] and impact on socio-economic and quality of life aspects [9-12]. For the necessary acute and  
8 rehabilitative care, the social economic impact is estimated to be 106,000 EUR per patient. In  
9 Germany additional costs of 935,000 EUR accrue if patients do not return to their former workplace  
10 [10].  
11  
12  
13  
14

15 Consequently, the aim to reduce short- and long-term burden after polytrauma is critically important  
16 [10, 12]. Thus, clinical parameters are necessary to support treatment processes and services in acute  
17 care facilities and to display short-term outcomes. Additionally, evaluations capturing a patient's  
18 views of short- and long-term outcomes in terms of e.g. psychological and physical factors, functional  
19 status and social interaction, are becoming increasingly important for doctors and nurses as well as for  
20 patients and their family members [12, 13]. The measurement of these patient-reported outcomes  
21 (PROs), which can also be reported e.g. by relatives in case of mental disability, is important for  
22 completing the assessment of relevant clinical outcomes after injury. To assess the impact of a  
23 polytrauma on quality of life and other relevant PROs it is necessary to question the patients [13, 14].  
24 The preferred gold-standard is a measurement at multiple times during the follow-up period to track  
25 trends and focus on long-term conditions and outcomes associated with polytrauma [14]. Therefore, it  
26 is necessary to know which instruments for assessing PROs are applied and how. So far, no systematic  
27 review has been identified providing an overview of assessed PROs after polytrauma, different  
28 instruments used to measure these as well as the application of these instruments. Thus, this systematic  
29 review will provide an overview of instruments used to measure PROs, including quality of life and  
30 other currently reported outcome measures for patients with polytrauma, and describe their application  
31 in detail.  
32  
33  
34  
35  
36  
37  
38  
39  
40

41 Currently the TraumaRegister DGU<sup>®</sup> collects data on emergency care, treatment in shock rooms,  
42 intensive care unit (ICU) and discharge [3, 13]. Regarding the comprehensive evaluation of the short  
43 and long-term burden, the register plans to expand their measurement battery by assessing patient-  
44 reported outcomes, e.g. quality of life.  
45  
46  
47

#### 48 **Aim of the study**

49 The aim of this systematic review is to:  
50  
51

- 52 i. collect instruments that assess patient-reported outcomes (quality of life, social participation,  
53 activities of daily living) during the follow-up after polytrauma
- 54 ii. describe the application of these instruments in detail (e.g. duration of period of follow-up,  
55 frequency of application, time of measurements during follow-up)  
56  
57  
58  
59

1  
2  
3 iii. investigate other relevant patient-reported outcomes that are additionally assessed in the included  
4 studies (e.g. pain, depression, anxiety, cognitive function) without reporting the application of  
5 instruments in detail.  
6  
7

## 8 9 **Method**

10 The systematic review protocol is developed in line with the quality requirements of the PRISMA-P  
11 statement [15], and the PRISMA statement will be considered during the review procedure [16]. The  
12 protocol was registered on 8 April 2017 at PROSPERO (registration number CRD42017060825).  
13  
14  
15

### 16 ***Databases***

17 The literature search will be conducted in the following databases: MEDLINE, EMBASE, CINAHL,  
18 PsycINFO, Cochrane Central Register of Controlled Trials (CENTRAL) and the trials registers  
19 ClinicalTrials.gov and WHO ICTRP. To ensure literature saturation, reference lists of eligible studies  
20 will be examined for further relevant publications.  
21  
22  
23  
24

### 25 ***Search strategy***

26 The search strategy will be developed in cooperation with a specialist for systematic reviews using  
27 database-specific controlled vocabulary and additional free-text terms. Appendix A provides the  
28 Medline search strategy that will be adapted to the other databases accordingly.  
29  
30  
31  
32

### 33 ***Inclusion and exclusion criteria***

34 Studies will be included if they match the following inclusion criteria: i) the study assesses patient-  
35 reported outcomes, such as quality of life (QoL)/health-related quality of life (HRQoL), social  
36 participation, activities of daily living (ADL), pain, depression, anxiety or cognitive function in people  
37 aged 18–75 years during a temporally clearly defined follow-up period after polytrauma (injuries  
38 involving at least two different areas of the body or organ systems, ISS >15, AIS ≥3); ii) original  
39 qualitative, quantitative, mixed-methods studies and all kinds of original empirical research that were  
40 published between 1 January 2005 and 3 August 2016; iii) English or German language publications  
41 will be considered; iv) the full text of the study is available (i.e. for contacting the authors). The  
42 interest in quality of life in research and its implication in practice has been growing since 2005 [17].  
43 As one of our main aims is to collect instruments measuring quality of life, we decided to include  
44 publications as of 2005. Our procedure is supported by the burgeoning perspective in clinical research  
45 on PROs and its relevance for the future in addition to clinical data [18]. A further reason was to  
46 capture the most recent developments in research on PROs. Therefore, we looked specifically for  
47 publications from the last 11 years.  
48  
49  
50  
51  
52  
53  
54  
55

56 Studies will be excluded from this review if they mention one of the following criteria: i) an injury-  
57 severity-score (ISS) ≤15 or an abbreviated injury scale (AIS) <3 or no reporting of ISS or AIS; ii) low-  
58  
59  
60

1  
2  
3 energy injuries, single or mono injuries or geriatric injuries, burn injuries, war injuries (group of  
4 veterans or military staff are excluded), cancer and other chronic diseases as secondary diagnosis; iii)  
5 publications in which the primary aim does not focus on patient-reported outcomes; iv) grey literature,  
6 books, letters/short reports, abstracts, editorials, comments or discussion papers as well as case  
7 studies, systematic reviews and meta-analysis. However, the two latter will be screened to identify  
8 further appropriate studies.  
9

### 10 11 12 ***Study selection process*** 13

14 On the basis of predefined inclusion and exclusion criteria, suitable publications will be selected by  
15 title and abstract, and independently screened by two reviewers. A third reviewer will solve  
16 differences concerning the inclusion or exclusion of studies. In order to foster the process of suitability  
17 decisions, inclusion and exclusion of the first 50 publications by title and abstract screening will be  
18 discussed between the two reviewers. Subsequently, two reviewers assessing eligibility for final  
19 inclusion in this review will screen the full texts of the remaining publications again independently. A  
20 third reviewer will solve conflicts in the final inclusion or exclusion of studies. Inter-rater reliability  
21 will be determined after the title abstract as well as after the full-text screening.  
22  
23  
24  
25  
26

### 27 ***Data extraction and synthesis*** 28

29 The data extraction will be performed according to the requirements of Cochrane reviews [19]. For  
30 data extraction two experienced researchers will use a piloted data extraction sheet independently.  
31 Extracted data from the included studies will provide an overview of: first author and publication year,  
32 study design, country, study population (number of subjects, proportion of men, mean age with  
33 standard deviation and range, kind of injury, ISS, AIS, other characteristics), treatment, aim of the  
34 study, findings, and, furthermore, for the reported PROs according to aim 1, applied instruments to  
35 assess these PROs, description of the instrument, data collection (method of assessment, time of  
36 measurements, length of follow-up period, quality criteria of instruments (e.g. validity, reliability) and  
37 modifications of the instruments. Furthermore, the result of the critical appraisal of the study quality  
38 will be added.  
39  
40  
41  
42  
43  
44

### 45 ***Critical appraisal*** 46

47 In the final selection of eligible studies two reviewers will independently perform a quality appraisal  
48 to assess the methodological quality and the risk of bias in each study type using standardised  
49 checklists of the UK National Institute for Health and Care Excellence (NICE) [20] or Scottish  
50 Intercollegiate Guidelines Network (SIGN) [21] or the Mixed Method Appraisal Tool (MMAT) [22].  
51 Reviewers will resolve disagreements through discussion.  
52  
53  
54  
55  
56  
57  
58  
59  
60



## Discussion

We will perform the proposed systematic review to generate an overview of the instruments used to assess PROs in the field of polytrauma. The results of this systematic review will serve as a basis to expand the TraumaRegister DGU<sup>®</sup> with a focus on quality of life measures. Likewise, the additional knowledge on further PROs, e.g. pain, depression, anxiety, cognitive function, might emphasise the patients' perspectives on relevant outcomes after polytrauma and lead to its consideration in the provision of health services. Subsequently, health care providers and policymakers may draw their attention on this topic and will implement the assessment of PROs in decision-making regarding the treatment process.

## Contributorship statement

A.I. is the guarantor. I.G., M.R., S.A., S.K. and A.I. drafted the manuscript. I.G., M.R., A.H.F., M.I.M., S.A. and S.K. developed the search strategy. A.I., I.G., M.R., S.A., S.K., K.M., A.H.F., M.I.M., S.F., J.S. and J.W. contributed to the development of the selection criteria, the risk of bias assessment strategy and data extraction criteria. A.I., I.G., M.R., S.A., S.K., K.M., A.H.F., M.I.M., S.F., J.S. and J.W. read, provided feedback and approved the final manuscript.

## Competing interests

Johannes Sturm is executive secretary of the Academy for Trauma Surgery (AUC). The authors declare that they have no competing interests.

## Funding

This systematic review is funded by the AUC. The funding will support the conduct of this systematic review.

## Data sharing statement

There will be no additional unpublished data.

## Consent for publication

All authors have approved the manuscript for submission. The content of the manuscript has not been published or submitted for publication elsewhere.

**Ethics committee approval information**

Since this is a protocol for a systematic review that will be based on published data, ethical approval is not required.

For peer review only

## References

1. Ringburg AN, Polinder S, van Ierland MC, Steyerberg EW, van Lieshout EM, Patka P, et al. Prevalence and prognostic factors of disability after major trauma. *J Trauma*. 2011; 70 (4): 916-22.
2. Lerfering R. Trauma Score Systems of Quality Assessment. *European Journal of Trauma*. 2002; 28: 52-63.
3. Deutsche Gesellschaft für Unfallchirurgie e. V. (DGU). Weißbuch Schwerverletztenversorgung. 2. ed. Berlin: Thieme; 2012. Available from: <http://www.dgu-online.de/qualitaet-sicherheit/schwerverletzte/weissbuch-schwerverletztenversorgung.html>. Accessed 11.11.2016.
4. Soreide K. Epidemiology of major trauma. *British Journal of Surgery*. 2009; 96 (7): 697-8.
5. Lefering R, Sektion NIS der DGU. TraumaRegister® der DGU. Jahresbericht 2016. Available from: [http://www.traumanetzwerk-dgu.de/fileadmin/user\\_upload/alle\\_webseiten/docs/2016\\_Jahresbericht\\_TraumaRegister\\_DGU\\_2015.pdf](http://www.traumanetzwerk-dgu.de/fileadmin/user_upload/alle_webseiten/docs/2016_Jahresbericht_TraumaRegister_DGU_2015.pdf). Accessed 2.7.2017.
6. Debus F, Lefering R, Frink M, Kühne CA, Mand C, Bücking B, et al. [Numbers of Severely Injured Patients in Germany. A Retrospective Analysis From the DGU (German Society for Trauma Surgery) Trauma Registry.]. *Deutsches Ärzteblatt international*. 2015; 12 (49): 823-9.
7. Pape-Köhler CIA, Simanski C, Nienaber U, Lefering R. External factors and the incidence of severe trauma: Time, date, season and moon. *Injury*. 2014; 45, Supplement 3: S93-S9.
8. Vles WJ, Steyerberg EW, Essink-Bot ML, van Beeck EF, Meeuwis JD, LP L. Prevalence and determinants of disabilities and return to work after major trauma. *Journal of Trauma*. 2005; 58 (1): 126-35.
9. Stürmer M and Neugebauer E. S3\_Polytrauma\_Schwerverletzten-Behandlung, D.G.f. Unfallchirurgie, Editor. 2015: AWMF Online.
10. Hayes J, Black N, Jenkinson C, Young J, Rowan K, Daly K, et al. Outcome measures for adult critical care: a systematic review. *HTA Programme*. 2000.
11. Häusler JM, Tobler B, Arnet B, Huesler J, H Z. Pilot study on the comprehensive economic costs of major trauma: Consequential costs are well in excess of medical costs. *Journal of Trauma*. 2006; 61 (723-731).
12. Post RB, van der Sluis CK, Ten Duis HJ. Return to work and quality of life in severely injured patients. *Disability and Rehabilitation*. 2006; 28 (22): 1399-404.
13. Sittaro NA, Lohse R, Panzica M, Probst C, Pape HC, Krettek C. Hannover-Polytrauma-Long-term-Study HPLS (II). *Versicherungsmedizin*. 2007; 59 (2): 81-7.
14. Ardolino A, Sleat G, Willett K. Outcome measurements in major trauma--results of a consensus meeting. *Injury*. 2012; 43 (10): 1662-6.
15. Moher D, Shamseer L, Clarke M, Ghersi D, Liberati A, Petticrew M, et al. Preferred reporting items for systematic review and meta-analysis protocols (PRISMA-P) 2015 statement. *Systematic Review*. 2015; 4 (1): 1-9.
16. Moher D, Liberati A, Tetzlaff J, Altman DG, and The PRISMA Group. Preferred Reporting Items for Systematic Reviews and Meta Analyses: The PRISMA Statement. *Open Medicine*. 2009; 3 (3): 123-30.
17. Bullinger M. [The concept of quality of life in medicine: its history and current relevance]. *Zeitschrift für Evidenz, Fortbildung und Qualität im Gesundheitswesen*. 2014; 108 (2-3): 97-103.
18. Deshpande PR, Rajan S, Sudeepthi BL, Abdul Nazir CP. Patient-reported outcomes: A new era in clinical research. *Perspectives in clinical research*. 2011; 2 (4): 137-44.
19. The Cochrane Collaboration. The Cochrane Handbook for Systematic Reviews of Interventions. Version 5.1.0. 2011. Available from: <http://handbook.cochrane.org>. Accessed 11.11.2016.
20. NICE (National Institute for Health and Care Excellence). Methods for the development of NICE public health guidance. Available from: <https://www.nice.org.uk/article/pmg4/chapter/1%20introduction2012>. Accessed 11.11.2016.
21. SIGN (Scottish Intercollegiate Guideline Network). Methodology Checklist 5: Diagnostic studies. Available from: <http://www.sign.ac.uk/methodology/checklists.html>. Accessed 8.12.2016.

1  
2  
3 22. Pace R, Pluye P, Bartlett G, Macaulay A C, Salsberg J, Jagosh J, et al. Testing the reliability  
4 and efficiency of the pilot Mixed Methods Appraisal Tool (MMAT) for systematic mixed studies  
5 review. *International Journal of Nursing Studies*. 2012; 49: 47-53.  
6  
7  
8  
9  
10  
11  
12  
13  
14  
15  
16  
17  
18  
19  
20  
21  
22  
23  
24  
25  
26  
27  
28  
29  
30  
31  
32  
33  
34  
35  
36  
37  
38  
39  
40  
41  
42  
43  
44  
45  
46  
47  
48  
49  
50  
51  
52  
53  
54  
55  
56  
57  
58  
59  
60

## Appendix A

Medline (PubMed, 03.08.2016)

#1

"Multiple Trauma"[mh] OR multiple trauma\*[tw] OR polytrauma\*[tw]

#2

"Quality of Life"[mh] or "quality of life"[tw] or "life quality"[tw] OR QoL[tw] OR HRQoL[tw] OR satisf\*[tw] OR "self reported health"[tw] OR "Activities of Daily Living"[mh] OR "activities of daily living"[tw] OR "daily living activity"[tw] OR "daily living activities"[tw] OR "activity of daily living"[tw] OR "limitation of activity"[tw] OR "self care"[tw] OR "physical functioning"[tw] OR functional abilit\*[tw] OR "functional assessment"[tw] OR "Social Participation"[mh] OR "social participation"[tw] OR social activit\*[tw] OR "social functioning"[tw] OR "social interaction"[tw] OR "social isolation"[tw] OR "social integration"[tw] OR "Pain"[mh] OR pain[tw] OR "Depression"[mh] OR "Depressive Disorder"[mh] OR depress\*[tw] OR "emotional distress"[tw] OR "Stress, Psychological"[mh] OR stress[tw] OR "Anxiety"[mh] OR anxiet\*[tw] OR "Independent Living"[mh] OR "independent living"[tw] OR "community dwelling"[tw] OR "wellbeing"[tw] OR "well being"[tw] OR "Cognition Disorders"[mh] OR cognitive function\*[tw] OR "mental health"[tw] OR "cognitive impairment"[tw] OR "Patient Outcome Assessment"[mh] OR "patient reported outcome"[tw] OR "patient reported outcomes"[tw] OR "patient related outcome"[tw] OR "patient related outcomes"[tw] OR "patient centered outcomes"[tw] OR "patient centered outcome"[tw] OR rehabilitation outcome\*[tw] OR "Work Capacity Evaluation"[mh] OR "work capacity"[tw] OR "occupational function"[tw] OR "Stress Disorders, Post-Traumatic"[mh] OR PTSD[tw] OR "traumatic stress disorder"[tw] OR "posttraumatic stress disorder"[tw]

#3

#1 AND #2

#4

#3 AND Filters: Publication date from 2005/01/01 to 2016/12/31; English; German

= 836

**PRISMA-P (Preferred Reporting Items for Systematic review and Meta-Analysis Protocols) 2015 checklist: recommended items to address in a systematic review protocol\***

| Section and topic                 | Item No | Checklist item                                                                                                                                                                                                                | Check        |
|-----------------------------------|---------|-------------------------------------------------------------------------------------------------------------------------------------------------------------------------------------------------------------------------------|--------------|
| <b>ADMINISTRATIVE INFORMATION</b> |         |                                                                                                                                                                                                                               | <b>Check</b> |
| Title:                            |         |                                                                                                                                                                                                                               |              |
| Identification                    | 1a      | Identify the report as a protocol of a systematic review                                                                                                                                                                      | Yes, p. 1    |
| Update                            | 1b      | If the protocol is for an update of a previous systematic review, identify as such                                                                                                                                            | NA           |
| Registration                      | 2       | If registered, provide the name of the registry (such as PROSPERO) and registration number                                                                                                                                    | Yes p. 4     |
| Authors:                          |         |                                                                                                                                                                                                                               |              |
| Contact                           | 3a      | Provide name, institutional affiliation, e-mail address of all protocol authors; provide physical mailing address of corresponding author                                                                                     | Yes, p. 1-3  |
| Contributions                     | 3b      | Describe contributions of protocol authors and identify the guarantor of the review                                                                                                                                           | Yes, p. 8    |
| Amendments                        | 4       | If the protocol represents an amendment of a previously completed or published protocol, identify as such and list changes; otherwise, state plan for documenting important protocol amendments                               | NA           |
| Support:                          |         |                                                                                                                                                                                                                               |              |
| Sources                           | 5a      | Indicate sources of financial or other support for the review                                                                                                                                                                 | Yes, p. 8    |
| Sponsor                           | 5b      | Provide name for the review funder and/or sponsor                                                                                                                                                                             | Yes, p. 8    |
| Role of sponsor or funder         | 5c      | Describe roles of funder(s), sponsor(s), and/or institution(s), if any, in developing the protocol                                                                                                                            | Yes, p.8     |
| <b>INTRODUCTION</b>               |         |                                                                                                                                                                                                                               |              |
| Rationale                         | 6       | Describe the rationale for the review in the context of what is already known                                                                                                                                                 | Yes, p. 4-5  |
| Objectives                        | 7       | Provide an explicit statement of the question(s) the review will address with reference to participants, interventions, comparators, and outcomes (PICO)                                                                      | Yes, p. 5    |
| <b>METHODS</b>                    |         |                                                                                                                                                                                                                               |              |
| Eligibility criteria              | 8       | Specify the study characteristics (such as PICO, study design, setting, time frame) and report characteristics (such as years considered, language, publication status) to be used as criteria for eligibility for the review | Yes, p. 6    |
| Information sources               | 9       | Describe all intended information sources (such as electronic databases, contact with study authors, trial registers or other grey literature sources) with planned dates of coverage                                         | Yes, p. 6    |
| Search strategy                   | 10      | Present draft of search strategy to be used for at least one electronic database, including planned limits, such that it could be repeated                                                                                    | Yes, p. 11   |

1  
2  
3  
4  
5  
6  
7  
8  
9  
10  
11  
12  
13  
14  
15  
16  
17  
18  
19  
20  
21  
22  
23  
24  
25  
26  
27  
28  
29  
30  
31  
32  
33  
34  
35  
36  
37  
38  
39  
40  
41  
42  
43  
44  
45  
46  
47

|                                    |     |                                                                                                                                                                                                                                                  |           |
|------------------------------------|-----|--------------------------------------------------------------------------------------------------------------------------------------------------------------------------------------------------------------------------------------------------|-----------|
| Study records:                     |     |                                                                                                                                                                                                                                                  |           |
| Data management                    | 11a | Describe the mechanism(s) that will be used to manage records and data throughout the review                                                                                                                                                     | NA        |
| Selection process                  | 11b | State the process that will be used for selecting studies (such as two independent reviewers) through each phase of the review (that is, screening, eligibility and inclusion in meta-analysis)                                                  | Yes, p. 7 |
| Data collection process            | 11c | Describe planned method of extracting data from reports (such as piloting forms, done independently, in duplicate), any processes for obtaining and confirming data from investigators                                                           | Yes, p. 7 |
| Data items                         | 12  | List and define all variables for which data will be sought (such as PICO items, funding sources), any pre-planned data assumptions and simplifications                                                                                          | Yes, p. 7 |
| Outcomes and prioritization        | 13  | List and define all outcomes for which data will be sought, including prioritization of main and additional outcomes, with rationale                                                                                                             | Yes, p. 5 |
| Risk of bias in individual studies | 14  | Describe anticipated methods for assessing risk of bias of individual studies, including whether this will be done at the outcome or study level, or both; state how this information will be used in data synthesis                             | Yes, p. 7 |
| Data synthesis                     | 15a | Describe criteria under which study data will be quantitatively synthesised                                                                                                                                                                      | NA        |
|                                    | 15b | If data are appropriate for quantitative synthesis, describe planned summary measures, methods of handling data and methods of combining data from studies, including any planned exploration of consistency (such as $I^2$ , Kendall's $\tau$ ) | NA        |
|                                    | 15c | Describe any proposed additional analyses (such as sensitivity or subgroup analyses, meta-regression)                                                                                                                                            | NA        |
|                                    | 15d | If quantitative synthesis is not appropriate, describe the type of summary planned                                                                                                                                                               | NA        |
| Meta-bias(es)                      | 16  | Specify any planned assessment of meta-bias(es) (such as publication bias across studies, selective reporting within studies)                                                                                                                    | NA        |
| Confidence in cumulative evidence  | 17  | Describe how the strength of the body of evidence will be assessed (such as GRADE)                                                                                                                                                               | NA        |

**\* It is strongly recommended that this checklist be read in conjunction with the PRISMA-P Explanation and Elaboration (cite when available) for important clarification on the items. Amendments to a review protocol should be tracked and dated. The copyright for PRISMA-P (including checklist) is held by the PRISMA-P Group and is distributed under a Creative Commons Attribution Licence 4.0.**

*From: Shamseer L, Moher D, Clarke M, Ghersi D, Liberati A, Petticrew M, Shekelle P, Stewart L, PRISMA-P Group. Preferred reporting items for systematic review and meta-analysis protocols (PRISMA-P) 2015: elaboration and explanation. BMJ. 2015 Jan 2;349(jan02 1):g7647.*

# BMJ Open

## Assessment of patient-reported outcomes after polytrauma: protocol for a systematic review

|                                 |                                                                                                                                                                                                                                                                                                                                                                                                                                                                                                                                                                                                                                                                                                                                                                                                                                                                                                                                                                                                                                                                                                                                                                                                                                                                                                                                                                                                                                                                                                                                                                                                                                                                                                      |
|---------------------------------|------------------------------------------------------------------------------------------------------------------------------------------------------------------------------------------------------------------------------------------------------------------------------------------------------------------------------------------------------------------------------------------------------------------------------------------------------------------------------------------------------------------------------------------------------------------------------------------------------------------------------------------------------------------------------------------------------------------------------------------------------------------------------------------------------------------------------------------------------------------------------------------------------------------------------------------------------------------------------------------------------------------------------------------------------------------------------------------------------------------------------------------------------------------------------------------------------------------------------------------------------------------------------------------------------------------------------------------------------------------------------------------------------------------------------------------------------------------------------------------------------------------------------------------------------------------------------------------------------------------------------------------------------------------------------------------------------|
| Journal:                        | <i>BMJ Open</i>                                                                                                                                                                                                                                                                                                                                                                                                                                                                                                                                                                                                                                                                                                                                                                                                                                                                                                                                                                                                                                                                                                                                                                                                                                                                                                                                                                                                                                                                                                                                                                                                                                                                                      |
| Manuscript ID                   | bmjopen-2017-017571.R2                                                                                                                                                                                                                                                                                                                                                                                                                                                                                                                                                                                                                                                                                                                                                                                                                                                                                                                                                                                                                                                                                                                                                                                                                                                                                                                                                                                                                                                                                                                                                                                                                                                                               |
| Article Type:                   | Protocol                                                                                                                                                                                                                                                                                                                                                                                                                                                                                                                                                                                                                                                                                                                                                                                                                                                                                                                                                                                                                                                                                                                                                                                                                                                                                                                                                                                                                                                                                                                                                                                                                                                                                             |
| Date Submitted by the Author:   | 06-Dec-2017                                                                                                                                                                                                                                                                                                                                                                                                                                                                                                                                                                                                                                                                                                                                                                                                                                                                                                                                                                                                                                                                                                                                                                                                                                                                                                                                                                                                                                                                                                                                                                                                                                                                                          |
| Complete List of Authors:       | Gnass, Irmela ; Heinrich-Heine-University Düsseldorf, Institute for Health Services Research and Health Economics<br>Ritchel, Michaela; Heinrich-Heine-University Düsseldorf, Institute for Health Services Research and Health Economics<br>Andrich, Silke; Heinrich-Heine-University Düsseldorf, Institute for Health Services Research and Health Economics; German Diabetes Centre, Leibniz Centre for Diabetes Research, Heinrich-Heine-University, Institute for Health Services Research and Health Economics<br>Kuske, Silke; Heinrich-Heine-University Düsseldorf, Institute for Health Services Research and Health Economics; German Diabetes Centre, Leibniz Centre for Diabetes Research, Heinrich-Heine-University, Institute for Health Services Research and Health Economics<br>Moschinski, Kai; Heinrich-Heine-University Düsseldorf, Institute for Health Services Research and Health Economics<br>Herrmann-Frank, Annegret; Heinrich-Heine-University Düsseldorf, Institute for Health Services Research and Health Economics<br>Metzendorf, M; Heinrich-Heine University, Cochrane Metabolic and Endocrine Disorders Group, Institute of General Practice<br>Flohé, Sascha; Städtisches Klinikum Solingen; Heinrich-Heine-University Düsseldorf<br>Sturm, Johannes; Academy for Trauma Surgery - AUC<br>Windolf, Joachim; Heinrich-Heine-University Düsseldorf, Department of Trauma and Hand Surgery<br>Icks, Andrea; Heinrich-Heine-University Düsseldorf, Institute for Health Services Research and Health Economics; German Diabetes Centre, Leibniz Centre for Diabetes Research, Heinrich-Heine-University, Institute for Health Services Research and Health Economics |
| <b>Primary Subject Heading</b>: | Health services research                                                                                                                                                                                                                                                                                                                                                                                                                                                                                                                                                                                                                                                                                                                                                                                                                                                                                                                                                                                                                                                                                                                                                                                                                                                                                                                                                                                                                                                                                                                                                                                                                                                                             |
| Secondary Subject Heading:      | Patient-centred medicine                                                                                                                                                                                                                                                                                                                                                                                                                                                                                                                                                                                                                                                                                                                                                                                                                                                                                                                                                                                                                                                                                                                                                                                                                                                                                                                                                                                                                                                                                                                                                                                                                                                                             |
| Keywords:                       | Patient-reported Outcomes, Quality of Life, Polytrauma, Multiple Trauma, Activities of Daily Living, Social Participation                                                                                                                                                                                                                                                                                                                                                                                                                                                                                                                                                                                                                                                                                                                                                                                                                                                                                                                                                                                                                                                                                                                                                                                                                                                                                                                                                                                                                                                                                                                                                                            |
|                                 |                                                                                                                                                                                                                                                                                                                                                                                                                                                                                                                                                                                                                                                                                                                                                                                                                                                                                                                                                                                                                                                                                                                                                                                                                                                                                                                                                                                                                                                                                                                                                                                                                                                                                                      |

SCHOLARONE™  
Manuscripts



1  
2  
3  
4  
5  
6  
7  
8  
9  
10  
11  
12  
13  
14  
15  
16  
17  
18  
19  
20  
21  
22  
23  
24  
25  
26  
27  
28  
29  
30  
31  
32  
33  
34  
35  
36  
37  
38  
39  
40  
41  
42  
43  
44  
45  
46  
47  
48  
49  
50  
51  
52  
53  
54  
55  
56  
57  
58  
59  
60

For peer review only

## Assessment of patient-reported outcomes after polytrauma: protocol for a systematic review

Irmela Gnass\*, Michaela Ritschel\*, Silke Andrich, Silke Kuske, Kai Moschinski, Annegret Herrmann-Frank, Maria-Inti Metzendorf, Sascha Flohé, Johannes Sturm, Joachim Windolf, Andrea Icks

\* Shared first authorship

### Corresponding author

Michaela Ritschel, Heinrich-Heine University Düsseldorf, Institute for Health Services Research and Health Economics, Centre for Health and Society (CHS), Medical Faculty, Moorenstraße 5, Gebäude 14.82, 40225 Düsseldorf, e-mail: michaela.ritschel@hhu.de, phone: +49 (0)211 338 2404, fax: +49 (0)211 811 9778

Irmela Gnass  
Institute for Health Services Research and Health Economics  
Centre for Health and Society  
Medical Faculty  
Heinrich-Heine University Düsseldorf, Düsseldorf, Germany

Michaela Ritschel  
Institute for Health Services Research and Health Economics  
Centre for Health and Society  
Medical Faculty  
Heinrich-Heine University Düsseldorf, Düsseldorf, Germany

Silke Andrich  
Institute for Health Services Research and Health Economics  
Centre for Health and Society  
Medical Faculty  
Heinrich-Heine University Düsseldorf, Düsseldorf, Germany

Institute for Health Services Research and Health Economics  
German Diabetes Centre, Leibniz Centre for Diabetes Research  
Heinrich-Heine University Düsseldorf, Düsseldorf, Germany

1  
2  
3 Silke Kuske  
4 Institute for Health Services Research and Health Economics  
5 Centre for Health and Society  
6 Medical Faculty  
7  
8 Heinrich-Heine University Düsseldorf, Düsseldorf, Germany  
9

10  
11 Institute for Health Services Research and Health Economics  
12 German Diabetes Centre, Leibniz Centre for Diabetes Research  
13 Heinrich-Heine University Düsseldorf, Düsseldorf, Germany  
14  
15

16  
17 Kai Moschinski  
18 Institute for Health Services Research and Health Economics  
19 Centre for Health and Society  
20 Medical Faculty  
21  
22 Heinrich-Heine-University Düsseldorf, Düsseldorf, Germany  
23  
24

25  
26 Annegret Herrmann-Frank  
27 Institute for Health Services Research and Health Economics  
28 Centre for Health and Society  
29 Medical Faculty  
30  
31 Heinrich-Heine University Düsseldorf, Düsseldorf, Germany  
32  
33

34  
35 Maria-Inti Metzendorf  
36 Cochrane Metabolic and Endocrine Disorders Group  
37 Institute of General Practice  
38 Medical Faculty  
39  
40 Heinrich-Heine University Düsseldorf, Düsseldorf, Germany  
41  
42

43  
44 Sascha Flohé  
45 Klinik für Unfallchirurgie, Orthopädie und Handchirurgie  
46 Städtisches Klinikum Solingen gemeinnützige GmbH, Solingen, Germany  
47  
48 Heinrich-Heine University Düsseldorf, Düsseldorf, Germany  
49  
50

1  
2  
3 Johannes Sturm  
4 Academie for Trauma Surgery GmbH, München, Germany  
5

6  
7 Joachim Windolf  
8 Department of Trauma and Hand Surgery  
9  
10 Medical Faculty  
11 Heinrich-Heine University Düsseldorf, Düsseldorf, Germany  
12  
13

14  
15 Andrea Icks  
16 Institute for Health Services Research and Health Economics  
17 Centre for Health and Society  
18 Medical Faculty  
19 Heinrich-Heine University Düsseldorf, Düsseldorf, Germany  
20  
21

22  
23 Institute for Health Services Research and Health Economics  
24 German Diabetes Centre, Leibniz Centre for Diabetes Research  
25 Heinrich-Heine University Düsseldorf, Düsseldorf, Germany  
26  
27

28  
29 **Keywords:** patient-reported outcomes, quality of life, polytrauma, multiple trauma, activities of daily  
30 living, social participation  
31

32  
33  
34 **Word count:** 2,195  
35

36  
37 **Abstract:**

38  
39 Introduction: Survivors of polytrauma experience long- and short-term burden that influences their  
40 lives. The patients' view of relevant short- and long-term outcomes should be captured in instruments  
41 that measure quality of live and other patient-reported outcomes (PROs) after a polytrauma. The aim  
42 of this systematic review is to i) collect instruments that assess patient-reported outcomes (quality of  
43 life, social participation, activities of daily living) during follow-up after polytrauma, ii) describe the  
44 instruments' application (e.g. duration of period of follow-up), and iii) investigate other relevant  
45 patient-reported outcomes that are also assessed in the included studies (pain, depression, anxiety,  
46 cognitive function).  
47  
48  
49

50  
51 Methods and analysis: The systematic review protocol is developed in line with the PRISMA-P  
52 statement. MEDLINE, EMBASE, CINAHL, PsycINFO, Cochrane Central Register of Controlled  
53 Trials (CENTRAL) and the trials registers ClinicalTrials.gov and WHO ICTRP will be searched.  
54 Keywords, e.g. 'polytrauma', 'multiple trauma', 'quality of life', 'activities of daily living' or 'pain'  
55 will be used. Publications published between January 2005 and the most recent date (currently: August  
56  
57  
58  
59

2016) will be included. In order to present the latest possible results, an update of the search is conducted before publication. The data extraction and a content analysis will be carried out systematically. A critical appraisal will be performed.

Ethics and Dissemination: Formal ethical approval is not required as primary data will not be collected. The results will be published in a peer-reviewed publication. The systematic review is registered at PROSPERO (registration number CRD42017060825).

### Strengths and limitations of this study

- To the best of our knowledge, there are no published systematic reviews providing an overview of assessed patient-reported outcomes after polytrauma, different instruments used to measure these as well as the application of these instruments.
- This systematic review will report the identified instruments used to assess quality of life, social participation and activities of daily living, and describe their application.
- We will show additional measures for further relevant patient-reported outcomes following polytrauma, e.g. pain, depression, anxiety, cognitive function.
- A limitation of the review might be that publications will be included which were published since 2005. It cannot be ruled out in that case that relevant literature published before 2005 is missing.

### Introduction

Severe injuries represent a leading cause of death and permanent disability [1]. Especially in the central European region, such severely injured patients are termed as ‘polytrauma patients’ or as being ‘polytraumatised’. ‘Polytrauma’ is defined as having at least two severe injuries in different body regions that are potentially life-threatening. In the Anglo-American literature these patients are mostly referred to as ‘multiple-injury’, ‘multiple-trauma’ or ‘severely injured’. All these descriptions have in common that a certain degree of injury is required. The severity of trauma is usually indicated by the Injury Severity Score (ISS) [2]. In general, an  $ISS \geq 16$  falls within the definition of polytrauma, multiple-trauma or severely injured patients [1, 3]. In the following we use the term polytrauma. Comparing the incidence of trauma is challenging, considering the different definitions or conditions of trauma, and due to inconsistencies in the available data [4]. In 2015, according to the TraumaRegister DGU<sup>®</sup>, a German registry that cover patients with severe injuries, the number of severely multiply injured patients was 17,630 ( $ISS \geq 16$ ) [5]. In 2012 the number of severely multiply injured patients ( $ISS \geq 16$ ) reached approximately 18,400 per year. This corresponds to a cumulative incidence of 0.02% per year for Germany [6]. Persons affected are mostly male (72%) with a mean age of 46.5 years [7].

1  
2  
3 Due to strategies for early advanced life support, high quality in healthcare services, progress in  
4 treatment options and more traffic safety, survival rates after polytrauma are increasing. However,  
5 survivors are faced with long- and short-term burden after polytrauma: one year after polytrauma,  
6 patients continue to suffer from persisting problems with mobility (34%), self-care (15%) and  
7 activities of daily living (51%). Furthermore, they experience pain and/or discomfort (58%) as well as  
8 anxiety and/or depression (37%) [8]. Relevant disabilities, such as respiration limitations, para- or  
9 tetraplegia, are major causes for 40% of those affected not returning to their former workplace [6, 9,  
10 10] and impact on socio-economic and quality of life aspects [9-12]. For the necessary acute and  
11 rehabilitative care, the social economic impact is estimated to be 106,000 EUR per patient. In  
12 Germany additional costs of 935,000 EUR accrue if patients do not return to their former workplace  
13 [10].

14  
15  
16  
17  
18  
19  
20 Consequently, the aim to reduce short- and long-term burden after polytrauma is critically important  
21 [10, 12]. Thus, clinical parameters are necessary to support treatment processes and services in acute  
22 care facilities and to display short-term outcomes. Additionally, evaluations capturing a patient's view  
23 of short- and long-term outcomes in terms of e.g. psychological and physical factors, functional status  
24 and social interaction, are becoming increasingly important for doctors and nurses as well as for  
25 patients and their family members [12, 13]. The measurement of these patient-reported outcomes  
26 (PROs), which can also be reported e.g. by relatives in case of mental disability, is important for  
27 completing the assessment of relevant clinical outcomes after injury. To assess the impact of a  
28 polytrauma on quality of life and other relevant PROs it is necessary to question the patients [13, 14].  
29 The preferred gold-standard is a measurement at multiple times during the follow-up period to track  
30 trends and focus on long-term conditions and outcomes associated with polytrauma [14]. Therefore, it  
31 is necessary to know which instruments for assessing PROs are applied and how. So far, no systematic  
32 review has been identified providing an overview of assessed PROs after polytrauma, different  
33 instruments used to measure these as well as the application of these instruments. Thus, this systematic  
34 review will provide an overview of instruments used to measure PROs, including quality of life and  
35 other currently reported outcome measures for patients with polytrauma, and describe their application  
36 in detail.

37  
38  
39  
40  
41  
42  
43  
44  
45  
46 Currently the TraumaRegister DGU<sup>®</sup> collects data on emergency care, treatment in shock rooms,  
47 intensive care unit (ICU) and discharge [3, 13]. Regarding the comprehensive evaluation of the short  
48 and long-term burden, the register plans to expand their measurement battery by assessing patient-  
49 reported outcomes, e.g. quality of life.  
50  
51  
52  
53  
54  
55  
56  
57  
58  
59  
60

## **Aim of the study**

The aim of this systematic review is to:

- i. collect instruments that assess patient-reported outcomes (quality of life, social participation, activities of daily living) during the follow-up after polytrauma
- ii. describe the application of these instruments in detail (e.g. duration of period of follow-up, frequency of application, time of measurements during follow-up)
- iii. investigate other relevant patient-reported outcomes that are additionally assessed in the included studies (e.g. pain, depression, anxiety, cognitive function) without reporting the application of instruments in detail.

## **Method**

The systematic review protocol is developed in line with the quality requirements of the PRISMA-P statement [15], and the PRISMA statement will be considered during the review procedure [16]. The protocol was registered on 8 April 2017 at PROSPERO (registration number CRD42017060825). Prior to publication an update of the search will be performed to be able to present the latest results.

## **Databases**

The literature search will be conducted in the following databases: MEDLINE, EMBASE, CINAHL, PsycINFO, Cochrane Central Register of Controlled Trials (CENTRAL) and the trials registers ClinicalTrials.gov and WHO ICTRP. To ensure literature saturation, reference lists of eligible studies will be examined for further relevant publications.

## **Search strategy**

The search strategy will be developed in cooperation with a specialist for systematic reviews using database-specific controlled vocabulary and additional free-text terms. Appendix A provides the Medline search strategy that will be adapted to the other databases accordingly.

## **Inclusion and exclusion criteria**

Studies will be included if they match the following inclusion criteria: i) the study assesses patient-reported outcomes, such as quality of life (QoL)/health-related quality of life (HRQoL), social participation, activities of daily living (ADL), pain, depression, anxiety or cognitive function in people aged 18–75 years during a temporally clearly defined follow-up period after polytrauma (injuries involving at least two different areas of the body or organ systems, ISS >15, AIS ≥3); ii) all kinds of original empirical research that were published between 1 January 2005 and currently 3 August 2016; iii) English or German language publications will be considered; iv) the full text of the study is available (i.e. for contacting the authors). The interest in quality of life in research and its implication

1  
2  
3 in practice has been growing since 2005 [17]. As one of our main aims is to collect instruments  
4 measuring quality of life, we decided to include publications as of 2005. Our procedure is supported  
5 by the burgeoning perspective in clinical research on PROs and its relevance for the future in addition  
6 to clinical data [18]. A further reason was to capture the most recent developments in research on  
7 PROs. Therefore, we looked specifically for publications from the last 11 years.  
8  
9

10  
11 Studies will be excluded from this review if they mention one of the following criteria: i) an injury-  
12 severity-score (ISS)  $\leq 15$  or an abbreviated injury scale (AIS)  $< 3$  or no reporting of ISS or AIS; ii) low-  
13 energy injuries, single or mono injuries or geriatric injuries, burn injuries, war injuries (group of  
14 veterans or military staff are excluded), cancer and other chronic diseases as secondary diagnosis; iii)  
15 publications in which the primary aim does not focus on patient-reported outcomes; iv) grey literature,  
16 books, letters/short reports, abstracts, editorials, comments or discussion papers as well as case  
17 studies, systematic reviews and meta-analysis. However, systematic reviews and meta-analysis will be  
18 screened to identify further appropriate studies.  
19  
20  
21  
22

### 23 ***Study selection process***

24  
25 On the basis of predefined inclusion and exclusion criteria, suitable publications will be selected by  
26 title and abstract, and independently screened by two reviewers. A third reviewer will solve  
27 differences concerning the inclusion or exclusion of studies. In order to foster the process of suitability  
28 decisions, inclusion and exclusion of the first 50 publications by title and abstract screening will be  
29 discussed between the two reviewers. Subsequently, two reviewers assessing eligibility for final  
30 inclusion in this review will screen the full texts of the remaining publications again independently. A  
31 third reviewer will solve conflicts in the final inclusion or exclusion of studies. Inter-rater reliability  
32 will be determined after the title abstract as well as after the full-text screening.  
33  
34  
35  
36  
37

### 38 ***Data extraction and synthesis***

39  
40 The data extraction will be performed according to the requirements of Cochrane reviews [19]. For  
41 data extraction two experienced researchers will use a piloted data extraction sheet independently.  
42 Extracted data from the included studies will provide an overview of: first author and publication year,  
43 study design, country, study population (number of subjects, proportion of men, mean age with  
44 standard deviation and range, kind of injury, ISS, AIS, other characteristics), treatment, aim of the  
45 study, findings, and, furthermore, for the reported PROs according to aim 1, applied instruments to  
46 assess these PROs, description of the instrument, data collection (method of assessment, time of  
47 measurements, length of follow-up period, quality criteria of instruments (e.g. validity, reliability) and  
48 modifications of the instruments. Furthermore, the result of the critical appraisal of the study quality  
49 will be added.  
50  
51  
52  
53  
54  
55  
56  
57  
58  
59  
60



### ***Critical appraisal***

In the final selection of eligible studies two reviewers will independently perform a quality appraisal to assess the methodological quality and the risk of bias in each study type using standardised checklists of the UK National Institute for Health and Care Excellence (NICE) [20] or Scottish Intercollegiate Guidelines Network (SIGN) [21] or the Mixed Method Appraisal Tool (MMAT) [22]. Reviewers will resolve disagreements through discussion.

### **Discussion**

We will perform the proposed systematic review to generate an overview of the instruments used to assess PROs in the field of polytrauma. The results of this systematic review will serve as a basis to expand the TraumaRegister DGU<sup>®</sup> with a focus on quality of life measures. Likewise, the additional knowledge on further PROs, e.g. pain, depression, anxiety, cognitive function, might emphasise the patients' perspectives on relevant outcomes after polytrauma and lead to its consideration in the provision of health services. Subsequently, health care providers and policymakers may draw their attention on this topic and will implement the assessment of PROs in decision-making regarding the treatment process.

### **Contributorship statement**

A.I. is the guarantor. I.G., M.R., S.A., S.K. and A.I. drafted the manuscript. I.G., M.R., A.H.F., M.I.M., S.A. and S.K. developed the search strategy. A.I., I.G., M.R., S.A., S.K., K.M., A.H.F., M.I.M., S.F., J.S. and J.W. contributed to the development of the selection criteria, the risk of bias assessment strategy and data extraction criteria. A.I., I.G., M.R., S.A., S.K., K.M., A.H.F., M.I.M., S.F., J.S. and J.W. read, provided feedback and approved the final manuscript.

### **Competing interests**

Johannes Sturm is executive secretary of the Academy for Trauma Surgery GmbH (AUC). The authors declare that they have no competing interests.

### **Funding**

This systematic review is funded by the Academy for Trauma Surgery GmbH (AUC). The funding will support the conduct of this systematic review.

### **Data sharing statement**

There will be no additional unpublished data.

**Consent for publication**

All authors have approved the manuscript for submission. The content of the manuscript has not been published or submitted for publication elsewhere.

**Ethics committee approval information**

Since this is a protocol for a systematic review that will be based on published data, ethical approval is not required.

**Ethics and Dissemination**

Formal ethical approval is not required. The results will be published in a peer-reviewed publication.

## References

1. Ringburg AN, Polinder S, van Ierland MC, Steyerberg EW, van Lieshout EM, Patka P, et al. Prevalence and prognostic factors of disability after major trauma. *J Trauma*. 2011; 70 (4): 916-22.
2. Lerfering R. Trauma Score Systems of Quality Assessment. *European Journal of Trauma*. 2002; 28: 52-63.
3. Deutsche Gesellschaft für Unfallchirurgie e. V. (DGU). Weißbuch Schwerverletztenversorgung. 2. ed. Berlin: Thieme; 2012. Available from: <http://www.dgu-online.de/qualitaet-sicherheit/schwerverletzte/weissbuch-schwerverletztenversorgung.html>. Accessed 11.11.2016.
4. Soreide K. Epidemiology of major trauma. *British Journal of Surgery*. 2009; 96 (7): 697-8.
5. Lefering R, Sektion NIS der DGU. TraumaRegister® der DGU. Jahresbericht 2016. Available from: [http://www.traumanetzwerk-dgu.de/fileadmin/user\\_upload/alle\\_webseiten/docs/2016\\_Jahresbericht\\_TraumaRegister\\_DGU\\_2015.pdf](http://www.traumanetzwerk-dgu.de/fileadmin/user_upload/alle_webseiten/docs/2016_Jahresbericht_TraumaRegister_DGU_2015.pdf). Accessed 2.7.2017.
6. Debus F, Lefering R, Frink M, Kühne CA, Mand C, Bücking B, et al. [Numbers of Severely Injured Patients in Germany. A Retrospective Analysis From the DGU (German Society for Trauma Surgery) Trauma Registry.]. *Deutsches Ärzteblatt international*. 2015; 12 (49): 823-9.
7. Pape-Köhler CIA, Simanski C, Nienaber U, Lefering R. External factors and the incidence of severe trauma: Time, date, season and moon. *Injury*. 2014; 45, Supplement 3: S93-S9.
8. Vles WJ, Steyerberg EW, Essink-Bot ML, van Beeck EF, Meeuwis JD, LP L. Prevalence and determinants of disabilities and return to work after major trauma. *Journal of Trauma*. 2005; 58 (1): 126-35.
9. Stürmer M and Neugebauer E. S3\_Polytrauma\_Schwerverletzten-Behandlung, D.G.f. Unfallchirurgie, Editor. 2015: AWMF Online.
10. Hayes J, Black N, Jenkinson C, Young J, Rowan K, Daly K, et al. Outcome measures for adult critical care: a systematic review. *HTA Programme*. 2000.
11. Häusler JM, Tobler B, Arnet B, Huesler J, H Z. Pilot study on the comprehensive economic costs of major trauma: Consequential costs are well in excess of medical costs. *Journal of Trauma*. 2006; 61 (723-731).
12. Post RB, van der Sluis CK, Ten Duis HJ. Return to work and quality of life in severely injured patients. *Disability and Rehabilitation*. 2006; 28 (22): 1399-404.
13. Sittaro NA, Lohse R, Panzica M, Probst C, Pape HC, Krettek C. Hannover-Polytrauma-Long-term-Study HPLS (II). *Versicherungsmedizin*. 2007; 59 (2): 81-7.
14. Ardolino A, Sleat G, Willett K. Outcome measurements in major trauma--results of a consensus meeting. *Injury*. 2012; 43 (10): 1662-6.
15. Moher D, Shamseer L, Clarke M, Ghersi D, Liberati A, Petticrew M, et al. Preferred reporting items for systematic review and meta-analysis protocols (PRISMA-P) 2015 statement. *Systematic Review*. 2015; 4 (1): 1-9.
16. Moher D, Liberati A, Tetzlaff J, Altman DG, and The PRISMA Group. Preferred Reporting Items for Systematic Reviews and Meta Analyses: The PRISMA Statement. *Open Medicine*. 2009; 3 (3): 123-30.
17. Bullinger M. [The concept of quality of life in medicine: its history and current relevance]. *Zeitschrift für Evidenz, Fortbildung und Qualität im Gesundheitswesen*. 2014; 108 (2-3): 97-103.
18. Deshpande PR, Rajan S, Sudeepthi BL, Abdul Nazir CP. Patient-reported outcomes: A new era in clinical research. *Perspectives in clinical research*. 2011; 2 (4): 137-44.
19. The Cochrane Collaboration. The Cochrane Handbook for Systematic Reviews of Interventions. Version 5.1.0. 2011. Available from: <http://handbook.cochrane.org>. Accessed 11.11.2016.
20. NICE (National Institute for Health and Care Excellence). Methods for the development of NICE public health guidance. Available from: <https://www.nice.org.uk/article/pmg4/chapter/1%20introduction2012>. Accessed 11.11.2016.
21. SIGN (Scottish Intercollegiate Guideline Network). Methodology Checklist 5: Diagnostic studies. Available from: <http://www.sign.ac.uk/methodology/checklists.html>. Accessed 8.12.2016.

1  
2  
3 22. Pace R, Pluye P, Bartlett G, Macaulay A C, Salsberg J, Jagosh J, et al. Testing the reliability  
4 and efficiency of the pilot Mixed Methods Appraisal Tool (MMAT) for systematic mixed studies  
5 review. *International Journal of Nursing Studies*. 2012; 49: 47-53.  
6  
7  
8  
9  
10  
11  
12  
13  
14  
15  
16  
17  
18  
19  
20  
21  
22  
23  
24  
25  
26  
27  
28  
29  
30  
31  
32  
33  
34  
35  
36  
37  
38  
39  
40  
41  
42  
43  
44  
45  
46  
47  
48  
49  
50  
51  
52  
53  
54  
55  
56  
57  
58  
59  
60

## Appendix A

Medline (PubMed, 03.08.2016)

#1

"Multiple Trauma"[mh] OR multiple trauma\*[tw] OR polytrauma\*[tw]

#2

"Quality of Life"[mh] or "quality of life"[tw] or "life quality"[tw] OR QoL[tw] OR HRQoL[tw] OR satisf\*[tw] OR "self reported health"[tw] OR "Activities of Daily Living"[mh] OR "activities of daily living"[tw] OR "daily living activity"[tw] OR "daily living activities"[tw] OR "activity of daily living"[tw] OR "limitation of activity"[tw] OR "self care"[tw] OR "physical functioning"[tw] OR functional abilit\*[tw] OR "functional assessment"[tw] OR "Social Participation"[mh] OR "social participation"[tw] OR social activit\*[tw] OR "social functioning"[tw] OR "social interaction"[tw] OR "social isolation"[tw] OR "social integration"[tw] OR "Pain"[mh] OR pain[tw] OR "Depression"[mh] OR "Depressive Disorder"[mh] OR depress\*[tw] OR "emotional distress"[tw] OR "Stress, Psychological"[mh] OR stress[tw] OR "Anxiety"[mh] OR anxiet\*[tw] OR "Independent Living"[mh] OR "independent living"[tw] OR "community dwelling"[tw] OR "wellbeing"[tw] OR "well being"[tw] OR "Cognition Disorders"[mh] OR cognitive function\*[tw] OR "mental health"[tw] OR "cognitive impairment"[tw] OR "Patient Outcome Assessment"[mh] OR "patient reported outcome"[tw] OR "patient reported outcomes"[tw] OR "patient related outcome"[tw] OR "patient related outcomes"[tw] OR "patient centered outcomes"[tw] OR "patient centered outcome"[tw] OR rehabilitation outcome\*[tw] OR "Work Capacity Evaluation"[mh] OR "work capacity"[tw] OR "occupational function"[tw] OR "Stress Disorders, Post-Traumatic"[mh] OR PTSD[tw] OR "traumatic stress disorder"[tw] OR "posttraumatic stress disorder"[tw]

#3

#1 AND #2

#4

#3 AND Filters: Publication date from 2005/01/01 to 2016/12/31; English; German

= 836

**PRISMA-P (Preferred Reporting Items for Systematic review and Meta-Analysis Protocols) 2015 checklist: recommended items to address in a systematic review protocol\***

| Section and topic                 | Item No | Checklist item                                                                                                                                                                                                                | Check             |
|-----------------------------------|---------|-------------------------------------------------------------------------------------------------------------------------------------------------------------------------------------------------------------------------------|-------------------|
| <b>ADMINISTRATIVE INFORMATION</b> |         |                                                                                                                                                                                                                               | <b>Check</b>      |
| Title:                            |         |                                                                                                                                                                                                                               |                   |
| Identification                    | 1a      | Identify the report as a protocol of a systematic review                                                                                                                                                                      | Yes, p. 1         |
| Update                            | 1b      | If the protocol is for an update of a previous systematic review, identify as such                                                                                                                                            | NA                |
| Registration                      | 2       | If registered, provide the name of the registry (such as PROSPERO) and registration number                                                                                                                                    | Yes p. 4          |
| Authors:                          |         |                                                                                                                                                                                                                               |                   |
| Contact                           | 3a      | Provide name, institutional affiliation, e-mail address of all protocol authors; provide physical mailing address of corresponding author                                                                                     | Yes, p. 1-3       |
| Contributions                     | 3b      | Describe contributions of protocol authors and identify the guarantor of the review                                                                                                                                           | Yes, p. 8         |
| Amendments                        | 4       | If the protocol represents an amendment of a previously completed or published protocol, identify as such and list changes; otherwise, state plan for documenting important protocol amendments                               | NA                |
| Support:                          |         |                                                                                                                                                                                                                               |                   |
| Sources                           | 5a      | Indicate sources of financial or other support for the review                                                                                                                                                                 | Yes, p. 8         |
| Sponsor                           | 5b      | Provide name for the review funder and/or sponsor                                                                                                                                                                             | Yes, p. 8         |
| Role of sponsor or funder         | 5c      | Describe roles of funder(s), sponsor(s), and/or institution(s), if any, in developing the protocol                                                                                                                            | Yes, p.8          |
| <b>INTRODUCTION</b>               |         |                                                                                                                                                                                                                               |                   |
| Rationale                         | 6       | Describe the rationale for the review in the context of what is already known                                                                                                                                                 | Yes, p. 4-5       |
| Objectives                        | 7       | Provide an explicit statement of the question(s) the review will address with reference to participants, interventions, comparators, and outcomes (PICO)                                                                      | Yes, p. 6         |
| <b>METHODS</b>                    |         |                                                                                                                                                                                                                               |                   |
| Eligibility criteria              | 8       | Specify the study characteristics (such as PICO, study design, setting, time frame) and report characteristics (such as years considered, language, publication status) to be used as criteria for eligibility for the review | Yes, p. 6-7       |
| Information sources               | 9       | Describe all intended information sources (such as electronic databases, contact with study authors, trial registers or other grey literature sources) with planned dates of coverage                                         | Yes, p. 6         |
| Search strategy                   | 10      | Present draft of search strategy to be used for at least one electronic database, including planned limits, such that it could be repeated                                                                                    | Yes, see Appendix |

1  
2  
3  
4  
5  
6  
7  
8  
9  
10  
11  
12  
13  
14  
15  
16  
17  
18  
19  
20  
21  
22  
23  
24  
25  
26  
27  
28  
29  
30  
31  
32  
33  
34  
35  
36  
37  
38  
39  
40  
41  
42  
43  
44  
45  
46  
47

|                                    |     |                                                                                                                                                                                                                                                  |           |
|------------------------------------|-----|--------------------------------------------------------------------------------------------------------------------------------------------------------------------------------------------------------------------------------------------------|-----------|
| Study records:                     |     |                                                                                                                                                                                                                                                  |           |
| Data management                    | 11a | Describe the mechanism(s) that will be used to manage records and data throughout the review                                                                                                                                                     | NA        |
| Selection process                  | 11b | State the process that will be used for selecting studies (such as two independent reviewers) through each phase of the review (that is, screening, eligibility and inclusion in meta-analysis)                                                  | Yes, p. 7 |
| Data collection process            | 11c | Describe planned method of extracting data from reports (such as piloting forms, done independently, in duplicate), any processes for obtaining and confirming data from investigators                                                           | Yes, p. 7 |
| Data items                         | 12  | List and define all variables for which data will be sought (such as PICO items, funding sources), any pre-planned data assumptions and simplifications                                                                                          | Yes, p. 7 |
| Outcomes and prioritization        | 13  | List and define all outcomes for which data will be sought, including prioritization of main and additional outcomes, with rationale                                                                                                             | Yes, p. 6 |
| Risk of bias in individual studies | 14  | Describe anticipated methods for assessing risk of bias of individual studies, including whether this will be done at the outcome or study level, or both; state how this information will be used in data synthesis                             | Yes, p. 8 |
| Data synthesis                     | 15a | Describe criteria under which study data will be quantitatively synthesised                                                                                                                                                                      | NA        |
|                                    | 15b | If data are appropriate for quantitative synthesis, describe planned summary measures, methods of handling data and methods of combining data from studies, including any planned exploration of consistency (such as $I^2$ , Kendall's $\tau$ ) | NA        |
|                                    | 15c | Describe any proposed additional analyses (such as sensitivity or subgroup analyses, meta-regression)                                                                                                                                            | NA        |
|                                    | 15d | If quantitative synthesis is not appropriate, describe the type of summary planned                                                                                                                                                               | NA        |
| Meta-bias(es)                      | 16  | Specify any planned assessment of meta-bias(es) (such as publication bias across studies, selective reporting within studies)                                                                                                                    | NA        |
| Confidence in cumulative evidence  | 17  | Describe how the strength of the body of evidence will be assessed (such as GRADE)                                                                                                                                                               | NA        |

**\* It is strongly recommended that this checklist be read in conjunction with the PRISMA-P Explanation and Elaboration (cite when available) for important clarification on the items. Amendments to a review protocol should be tracked and dated. The copyright for PRISMA-P (including checklist) is held by the PRISMA-P Group and is distributed under a Creative Commons Attribution Licence 4.0.**

*From: Shamseer L, Moher D, Clarke M, Ghersi D, Liberati A, Petticrew M, Shekelle P, Stewart L, PRISMA-P Group. Preferred reporting items for systematic review and meta-analysis protocols (PRISMA-P) 2015: elaboration and explanation. BMJ. 2015 Jan 2;349(jan02 1):g7647.*
