# Supplementary material for: Assessment of patient-reported outcomes after polytrauma: protocol for a systematic review
Source: PubMed Central journal article supplement — BMJ Open. 2018 Mar 16;8(3):e017571. doi: 10.1136/bmjopen-2017-017571 (PMC5857702; doi:10.1136/bmjopen-2017-017571), 2018-03-16
Supplement: bmjopen-2017-017571supp001.pdf [file bmjopen-2017-017571supp001.pdf]

## Appendix A

Medline (PubMed, 03.08.2016)

#1

"Multiple Trauma"[mh] OR multiple trauma\*[tw] OR polytrauma\*[tw]

#2

"Quality of Life"[mh] or "quality of life"[tw] or "life quality"[tw] OR QoL[tw] OR HRQoL[tw] OR satisf\*[tw] OR "self reported health"[tw] OR "Activities of Daily Living"[mh] OR "activities of daily living"[tw] OR "daily living activity"[tw] OR "daily living activities"[tw] OR "activity of daily living"[tw] OR "limitation of activity"[tw] OR "self care"[tw] OR "physical functioning"[tw] OR functional abilit\*[tw] OR "functional assessment"[tw] OR "Social Participation"[mh] OR "social participation"[tw] OR social activit\*[tw] OR "social functioning"[tw] OR "social interaction"[tw] OR "social isolation"[tw] OR "social integration"[tw] OR "Pain"[mh] OR pain[tw] OR "Depression"[mh] OR "Depressive Disorder"[mh] OR depress\*[tw] OR "emotional distress"[tw] OR "Stress, Psychological"[mh] OR stress[tw] OR "Anxiety"[mh] OR anxiet\*[tw] OR "Independent Living"[mh] OR "independent living"[tw] OR "community dwelling"[tw] OR "wellbeing"[tw] OR "well being"[tw] OR "Cognition Disorders"[mh] OR cognitive function\*[tw] OR "mental health"[tw] OR "cognitive impairment"[tw] OR "Patient Outcome Assessment"[mh] OR "patient reported outcome"[tw] OR "patient reported outcomes"[tw] OR "patient related outcome"[tw] OR "patient related outcomes"[tw] OR "patient centered outcomes"[tw] OR "patient centered outcome"[tw] OR rehabilitation outcome\*[tw] OR "Work Capacity Evaluation"[mh] OR "work capacity"[tw] OR "occupational function"[tw] OR "Stress Disorders, Post-Traumatic"[mh] OR PTSD[tw] OR "traumatic stress disorder"[tw] OR "posttraumatic stress disorder"[tw]

#3

#1 AND #2

#4

#3 AND Filters: Publication date from 2005/01/01 to 2016/12/31; English; German

= 836
